1                   **Influence of pathway topology and functional class on the molecular**  
2                   **evolution of human metabolic genes**

3  
4                   **Ludovica Montanucci<sup>1</sup>, Hafid Laayouni<sup>1,2</sup>, Begoña Dobón<sup>1</sup>, Kevin L. Keys<sup>1,3</sup>,**

5                   **Jaume Bertranpetit<sup>1,\*</sup> and Juli Peretó<sup>4</sup>**

6  
7  
8                   <sup>1</sup> IBE Evolutionary Biology Institute (CSIC- UPF), Universitat Pompeu Fabra, PRBB, Doctor  
9 Aiguader 88, Barcelona, Catalonia, Spain.

10                   <sup>2</sup> Bioinformatics Studies, ESCI-UPF, Pg. Pujades 1, 08003 Barcelona, Catalonia, Spain.

11                   <sup>3</sup> Department of Medicine, University of California-San Francisco, San Francisco, CA, USA

12                   <sup>4</sup> Institute of Systems Biology, Department of Biochemistry and Molecular Biology,  
13 University of Valencia, Valencia, Spain.

14                   \*Corresponding author: [jaume.bertranpetit@upf.edu](mailto:jaume.bertranpetit@upf.edu)

18           **Abstract**

19           Metabolic networks comprise thousands of enzymatic reactions functioning in a controlled  
20 manner and have been shaped by natural selection. Thanks to the genome data, the footprints of  
21 adaptive (positive) selection are detectable, and the strength of purifying selection can be measured.  
22 This has made possible to know where, in the metabolic network, adaptive selection has acted and  
23 where purifying selection is more or less strong and efficient. We have carried out a comprehensive  
24 molecular evolutionary study of all the genes involved in the human metabolism. We investigated  
25 the type and strength of the selective pressures that acted on the enzyme-coding genes belonging to  
26 metabolic pathways during the divergence of primates and rodents. Then, we related those selective  
27 pressures to the functional and topological characteristics of the pathways. We have used DNA  
28 sequences of all enzymes (956) of the metabolic pathways comprised in the HumanCyc database,  
29 using genome data for humans and five other mammalian species.

30           We have found that the evolution of metabolic genes is primarily constrained by the layer of  
31 the metabolism in which the genes participate: while genes encoding enzymes of the inner core of  
32 metabolism are much conserved, those encoding enzymes participating in the outer layer, mediating  
33 the interaction with the environment, are evolutionarily less constrained and more plastic, having  
34 experienced faster functional evolution. Genes that have been targeted by adaptive selection are  
35 endowed by higher out-degree centralities than non-adaptive genes, while genes with high in-degree  
36 centralities are under stronger purifying selection. When the position along the pathway is  
37 considered, a funnel-like distribution of the strength of the purifying selection is found. Genes at  
38 bottom positions are highly preserved by purifying selection, whereas genes at top positions,  
39 catalyzing the first steps, are open to evolutionary changes.

40           These results show how functional and topological characteristics of metabolic pathways  
41 contribute to shape the patterns of evolutionary pressures driven by natural selection and how  
42 pathway network structure matters in the evolutionary process that shapes the evolution of the  
43 system.

44

## 45 INTRODUCTION

46 Metabolism is the set of enzymatic reactions that allows the synthesis, degradation and  
47 transformation of the biochemical components necessary for the maintenance and reproduction of a  
48 cell. Understanding the evolution of a system whose functioning arises from the interplay of many  
49 cellular components, is important both, for understanding the biology of the cell and for unraveling  
50 general principles of evolution of complex biological systems.

51 The origin and evolution of metabolic pathways is a difficult problem and several ideas have  
52 been proposed (reviewed in Peretó 2011). Among them, the patchwork model has gained a general  
53 acceptance. It proposes the evolution of enzymes from broader to narrower substrate specificities  
54 through gene duplication and the cooption of metabolic functions by the diverse pathways (Yčas  
55 1974, Jensen 1976). Nevertheless, the ability to contrast different models has been limited by the  
56 fact that all of them predate the current availability of complete genome sequences from the three  
57 domains of life (Lazcano et al. 1995). Nowadays, complete genome sequences and subsequent  
58 reconstructions of genome-scale metabolic networks for many organisms have been used to test  
59 some of the predictions of evolutionary models. In the context of those systemic studies, the  
60 patchwork model exhibits a higher explicative power (Alves et al 2002; Light and Kraulis 2003;  
61 Diaz-Mejia et al 2007; Fani and Fondi 2009; Grassi and Tramontano 2011; Peretó 2012).

62 A full understanding of the evolution of metabolism also requires the understanding of the  
63 functional evolution of the enzymes. This can be achieved by investigating the selective pressures  
64 that have been acting on the genes that code for the enzymes (metabolic genes), and trying to  
65 understand their evolutionary dynamics in relation to the molecular systems they participate. An  
66 interesting approximation is the study of the selective pressures over the network structure of  
67 molecular systems; this can be achieved through the study of the relationship between parameters of  
68 the evolutionary histories of the enzyme-coding genes and the topological properties of their gene  
69 products within a network. Connectivity, which is the number of links of a node in a network, in a  
70 metabolic network represents the number of metabolic interactions and it is an initial measure for  
71 the topological description of each node.

72 Selective pressures are at the base of understanding adaptation and two main types have to be  
73 distinguished. By one hand purifying selection, which is the force that eliminates genetic variants  
74 that impair the function and, by the other, positive selection, in which one (or several) variants show  
75 a better adaptation and the frequency in the population will increase, reaching eventually fixation.

76 These evolutionary pressures may be detected and measured through  $dN/dS$  when comparing  
77 the genomes from different species. A negative correlation between connectivity and the

78 evolutionary rates have been reported in the *Drosophila* and yeast genome-scale metabolic  
79 networks. In these networks, highly connected genes have been shown to evolve at slower rates,  
80 indicating selective constraints acting on them (Vitkup et al. 2006; Greenberg et al. 2008). Hence  
81 connectivity has an effect on evolutionary rates, with higher connected genes under stronger  
82 purifying selection. In mammal genomes, the negative correlation between dN/dS and degree  
83 centrality is only found in four sub-cellular compartments while in other three a negative correlation  
84 is found between dN/dS and betweenness centrality (Hudson and Conant 2011).

85 This same approach, which couples the molecular evolution of genes with the knowledge of  
86 the interaction networks of their gene-products, has been also applied to study specific metabolic  
87 pathways, and the influence of the local network structure (that is the structure of only the  
88 metabolic pathway) is studied. This may reveal local strategies of adaptation that may be found  
89 different from the constraints imposed by the whole metabolic network, as well as it may shed light  
90 on network constraints specific to only specific pathways.. In these works, the analysis at the  
91 network level initially seeks differences in the strength of the selection on genes located upstream  
92 versus those located downstream in the pathway, in order to detect whether the position of a gene  
93 along the pathway may constrain gene evolution. In plant biosynthetic pathways, it has been found  
94 that upstream genes tend to evolve slower than those downstream due to a stronger selective  
95 constraint (Rausher et al. 1999; Lu and Rausher 2003; Rausher et al. 2008; Livingstone and  
96 Anderson 2009; Ramsay et al. 2009). The analyzed pathways are secondary metabolite  
97 biosyntheses, with an inherent directionality given by the consecutive steps of the biosynthetic  
98 process. Further, many of the analyzed pathways are organized into branched structures: one or few  
99 initial substrates are processed into many final outputs. In such branched pathways with no loops,  
100 upstream genes are more likely to be above branch points and hence to be involved in the synthesis  
101 of more products than downstream genes (Rausher et al. 1999). These branched structures are  
102 common to many biosynthetic metabolic pathways. A proposed explanation for the observed  
103 gradient in selective pressures is that upstream genes are under stronger purifying selection because  
104 they are more pleiotropic than those downstream, affecting a greater number of end products. When  
105 the evolution of the genes of the N-glycosylation pathway during the divergence of primates was  
106 analyzed, an opposite trend emerged, with genes at the downstream position of this metabolic  
107 pathway being more constrained than upstream ones (Montanucci et al 2011). In a non-metabolic  
108 pathway, phototransduction, proteins which are topologically central in the signaling pathway, were  
109 found to be more constrained in their evolution; proteins peripheral to the pathway have  
110 experienced a relaxation of selective pressures (Invergo et al 2013).

111 All these studies suggest the idea that a part of the variation of evolutionary rates in metabolic

112 pathways can be accounted for by the structure of their functional network, both the local metabolic  
113 pathway and the global whole-cell metabolic network. However, in the case of single metabolic  
114 pathways, different patterns have been found for different pathways and different species sets and  
115 no general pattern has emerged from these few cases. A large number of pathways and an overall  
116 vision of the metabolic network should be analyzed to reveal whether there exist general patterns in  
117 their evolutionary history and to better understand the distribution of selective pressures in the  
118 network, both in terms of constraints or adaptations. Here, we address the relationship between the  
119 topology of the whole set of human metabolic pathways during the time of divergence of primate  
120 and rodents and relate it to the evolutionary behavior of each gene in terms of natural selection  
121 (purifying and adaptive). Its relationship may help understand the distribution of evolutionary  
122 forces within complex biomolecular networks.

123

## 124 **METHODS**

### 125 **Data Set**

126 *Pathways* The data set is composed of the metabolic pathways comprised in the HumanCyc  
127 database, release 18.1. The number of human pathways present in HumanCyc 18.1 is 325. Of these,  
128 13 pathways were not considered in the present study because they are signaling or protein  
129 modification pathways. Two pathways (morphine biosynthesis and melatonin degradation III) could  
130 not be used because their reactions are not associated to any annotated human gene. The final total  
131 number of considered metabolic pathways for the analysis is then 310. Of these, 275 are base  
132 pathways (comprised of reactions only) while 35 are super-pathways, which are comprised of one  
133 or more pathways, plus possible additional reactions. These super-pathways were treated separately  
134 in the analysis because they add redundant information. A full list of the pathways can be found in  
135 Supplementary Table S1.

136 The election of HumanCyc may requires justification. Even if there are other sources of  
137 reconstruction of human metabolism (Duarte et al. 2007; Ma et al. 2007; Thiele et al. 2013), in  
138 our case the choice of the HumanCyc database was precisely driven by the fact that it  
139 annotates pathways, and the study of the influence of the local topology (pathway topology)  
140 on the evolution of metabolic genes was precisely the question motivating this work. Our  
141 main objective was to gather the best possible functional, expert-curated annotations within a  
142 pathway classification to be further manually curated and our examination indicated that  
143 HumanCyc had the best quality collection of pathways.

144        *Reactions* The total number of enzymatic reactions comprised in the 310 pathways that are  
145 associated to at least one annotated gene is 879.

146        *Genes* The total number of genes that encodes enzymes that take part in the annotated  
147 pathways is 956. Genes were functionally classified by assigning them to the functional class of the  
148 pathway in which they participate. Two different classification schemes were considered since there  
149 are different criteria according to which pathways can be assigned to distinct functional groups. The  
150 first classification scheme used, the ontology-based scheme, relies on the HumanCyc Pathway-  
151 ontology that aims at classifying pathways into a tree-based structure (as a gene ontology). We used  
152 the top level of the tree (the classes immediately below the root of the tree, which is “Pathway”) as  
153 classes to assign pathways. We used 7 of the 9 parent classes just after the root of the HumanCyc  
154 pathways ontology, excluding the two classes for non-metabolic pathways, “Macromolecule  
155 Modifications” and “Signal transduction pathways”. The basic criteria of this ontology rely on the  
156 metabolic mode of the pathway, for example biosynthesis versus degradation. The second  
157 classification schema, compound-based, is based on the kind of compounds that are primarily  
158 transformed in the pathway, for example nucleotide versus fatty acids (see classification in  
159 supplementary Table S1).

## 160        **Computation of Evolutionary Rates**

161        Evolutionary rates were estimated during the divergence of mammals and rodents. For each  
162 human gene, its orthologous sequences were derived from the following species: chimpanzee,  
163 orangutan, gorilla, mouse and rat. Multiple sequence alignments of the coding regions were  
164 downloaded from Ensembl (release 75). When absent, orthologous sequences were predicted, if  
165 possible, through a similarity search of the human gene sequence against the genome assembly,  
166 followed by subsequent gene prediction by GeneWise (Birney et al 2004), in a procedure described  
167 in Montanucci et al (2011). In case of predicted orthologues, multiple sequence alignments were  
168 obtained through T-coffee with default options by aligning protein sequences and then back-  
169 translating to genomic sequence. The same procedure was adopted for incomplete or bad quality  
170 sequences.

171        Evolutionary rates were computed using the codeml program of the PAML package (Yang  
172 2007). Two likelihood ratio tests between pairs of nested model (M1a versus M2a and M7 versus  
173 M8) were carried out to detect positive selection events. The overall strength of purifying selection  
174 on each gene was estimated through a unique  $dN/dS$  over the entire tree and sequence length (model  
175 M0). Each maximum-likelihood estimation, including likelihood ratio tests, was carried out 5 times,  
176 each with 3 different initial  $dN/dS$  values: 0.1, 1 and 2 to check for stability of the results to

177 repeated runs and different initial conditions. Final results of the likelihood ratio tests were  
178 corrected through a False Discovery Rate (FDR) method (Storey 2002). Positive selection was  
179 inferred when either one or both of the two likelihood ratio tests was significant after correcting for  
180 multiple testing. Given the shallow divergence considered, non-branch-specific models (M0  
181 averaged dN/dS and site-specific positive selection tests) provide the best estimation of the  
182 overall selective pressure acting on each gene, given that for low number of closely related  
183 species branch-specific estimations that lack the power to provide stable estimations.

184       Given the strong impact of alignment errors in generating spurious signals of positive  
185 selection, the alignments corresponding to genes with  $P < 0.05$  in the likelihood ratio test for  
186 positive selection were inspected visually. Alignment regions containing evident errors (usually  
187 contiguous positions in a sequence of the alignment with a suspiciously high number of  
188 differences often resulting from sequencing or assembly errors) were manually masked and  
189 then evolutionary rates and positive selection tests were then recomputed.

## 190       **Computation of Topological Parameters**

191       *Building the reaction graph.* Metabolic pathways were derived from HumanCyc. The  
192 classical representation of metabolic pathways, also used in HumanCyc, is through the substrate  
193 graph, in which nodes represent metabolites and edges represent reactions that transform  
194 metabolites. Here we represent pathways as reaction graphs (Montañez et al 2010), in which nodes  
195 represent reactions and edges link consecutive reactions. Consecutive reactions within a pathway  
196 were derived from the PREDECESSORS field of the pathways.dat flat-file of the HumanCyc  
197 database. The direction provided in this field was used to build directed graphs, in which edges are  
198 arrows having a direction that goes from the preceding to the following reaction. The graphs have  
199 been constructed through Python scripts from the flat-files downloaded from HumanCyc 18.1.

200       *Centrality measures.* Topological measures within the directed graphs built for each pathway  
201 independently were computed through build-in functions of the NetworkX Python package. Four  
202 centrality measures were computed: closeness, betweenness, and in-degree and out-degree  
203 centrality. Centrality measures for the corresponding undirected graphs were also computed.

204       *Loops.* A Boolean variable was derived for each pathway to detect whether the pathway  
205 contains loops. This computation has been achieved through the *simple\_cycles()* function of the  
206 NetworkX package applied to the directed graph. This variable was only computed for pathways of  
207 more than one reaction.

208       *Top/Bottom Position.* For each pathway, nodes were assigned to three different classes



209 depending whether they are at the beginning of the pathway (in-degree=0, “upstream”), at the end  
210 (out-degree=0, “downstream”) or in any other position in between (“intermediate”). The uppermost  
211 positions (top positions), are the first reaction steps of the pathway, corresponding to initial  
212 reactions. At bottom positions there are the reactions that produce the final products of the pathway.  
213 Reactions in any other position in between of these two are assigned to the same class  
214 (intermediate). Beside these three classes, a fourth class has been added for nodes (reactions) that  
215 become isolated when the substrate graph is transformed into the corresponding reaction graph.  
216 This is the case for pathways for which the reaction graph comprises more than one connected  
217 component. These reactions have the feature of directly catalyzing the end products of the pathway  
218 starting from the initial substrates, thus being at the beginning (first step) and at the end (last step) at  
219 the same time.

## 220 **Statistical Analyses**

221 To evaluate the importance of relationship between evolutionary estimates and the different  
222 descriptive network properties, we performed a multivariate analysis, through an automated linear  
223 modeling routine implemented in SPSS software. The automated linear modeling created a single  
224 standard model to explain the relationship between fields. The adopted linear modeling also  
225 included codon bias, protein length and CG content as explanatory variables. Before the linear  
226 modeling missing values were replaced. No variable selection method was used and all variables  
227 entered into the model were assessed. The automated linear modeling allows also for detecting  
228 outliers; however outliers were not excluded of the analysis. To compare groups, non-parametric  
229 methods were used. To correct for multiple testing, False Discovery Rate (FDR) methods were  
230 applied (Storey 2002).

231 Genes considered under positive selection were compared to the whole set of metabolic genes  
232 for several centrality measures using a permutation test. For every centrality measure, the mean  
233 score of the genes under positive selection was compared to the distribution of the mean scores of a  
234 set of randomly selected genes from the whole set of metabolic genes with the same sample size,  
235 using a permutation test (10.000 permutations).

236

## 237 **RESULTS**

### 238 **Data Set Description**

239 The total number of pathways used for the analysis is 310, with 275 base pathways and 35  
240 super pathways (see methods). A full list of the pathways can be found in supplementary Table S1.



241 Of the 275 base pathways, 30 comprise only one reaction, while the remaining 245 pathways  
242 comprise a number of reactions that ranges from 2 to 30. The majority of the pathways (208 out of  
243 275 base pathways and 28 out of 35 super pathways) show no loop structures. They are  
244 characterized by a non-feedback topology, with either linear or branched structures. For 27 of the  
245 35 super-pathways, their reaction set is fully comprised in base pathways, so excluding them from  
246 the analysis would not result in loss of reactions and genes.

247 The total number of genes associated to the reactions in the pathways is 956. 943 out of the  
248 956 genes participate in base pathways, while 13 genes (*NAGK*, *GGCT*, *SRR*, *TYW4*, *GGT1*, *EBP*,  
249 *SC5DL*, *DHCR7*, *DHCR24*, *CCBL1*, *OPLAH*, *CNDP2*, *CCBL2*) are associated to reactions that are  
250 uniquely present in super pathways. Of the 956 genes, 335 encode proteins that carry out their  
251 enzymatic activity within protein complexes while 621 genes encode proteins that are themselves  
252 the functional enzymes.

253 The relationship between enzymatic activities and enzymes is not one-to-one: on the one  
254 hand, each gene encodes an enzyme (or an enzymatic subunit) that may carry out more than one  
255 catalytic activity and, on the other hand, the same catalytic activity can be served by more than one  
256 enzyme (isoenzymes) that are encoded by different genes. Within this scenario, 71% of the genes  
257 (677 out of 956) code for enzymes (or enzymatic subunits) that carry out only one metabolic  
258 function, 26% of the genes (247 out of 956) are associate to a number of reactions between 2 and 5,  
259 and the remaining 3% of the genes (32 out of 956) are associated to more than 5 reactions. The  
260 genes whose encoded enzymes are associated to the biggest number of reactions are: *FASN* (fatty  
261 acid synthase), *CYP2A6* (a type of cytochrome P450), *UGT2B11* (a type of UDP-  
262 glucuronosyltransferase), *SCMOL* (a methylsterol monooxygenase) *DIO3* (deiodinase,  
263 iodothyronine, type III), *ALOX5* (arachidonate 5-lipoxygenase) and *ALDH3A2* (fatty aldehyde  
264 dehydrogenase).

## 265 **Purifying and Positive Selection in Metabolic Genes**

266 The evolutionary rates have been computed for 927 genes (for 29 it was not possible due to  
267 lack of or poor quality of one or more of the orthologous sequences) considering the full set of six  
268 species (human, chimpanzee, orangutan, gorilla, mouse and rat): the synonymous evolutionary rate  
269 ( $dS$ ), the non-synonymous evolutionary rate ( $dN$ ) and their ratio ( $dN/dS$ ), which provides the  
270 direction of the action of the selection and an overall estimation of the strength of the purifying  
271 selection that have acted on each gene. The distribution of the evolutionary rates can be seen in Fig  
272 1, which shows that the main force that has shaped the evolution of metabolic genes during the  
273 mammal evolution has been purifying selection, with all  $dN/dS$  values lower than 0.5.

274 Beside an estimation of purifying selection, for each one of the 927 genes we performed two  
275 likelihood ratio tests to look for sequence signature of positive selection. After multiple test  
276 correction, using false discovery rate, we found that only six genes show a significant P-value for  
277 the likelihood ratio test. The genes and their p values for the M7 versus M8 test are: CYP2E1 (P =  
278 0.0000005, corrected = 0.00043), HDC (P = 0.0000217, corrected = 0.01006), CES1 (P =  
279 0.0000471, corrected = 0.01455), DPM2 (P = 0.0001017, corrected = 0.02356), SPAM1 (P =  
280 0.0001575, corrected = 0.02919) and AKR1C1 (P = 0.0002451, corrected = 0.03787).

281 CYP2E1 is a member of the cytochrome 450 family of enzymes involved in the inactivation  
282 of drugs and xenobiotics. The HDC gene codes for histidine decarboxylase, which converts L-  
283 histidine into histamine, a biogenic amine involved in different physiological processes such as  
284 neurotransmission, gastric acid secretion, inflammation and regulation of circadian rhythm. CES1  
285 codes for a carboxylesterase involved in the hydrolysis of various xenobiotics and drug clearance in  
286 liver. DPM2 encodes for the regulatory subunit of the dolichol-phosphate mannose (DPM) synthase  
287 complex whose main function is recognition on the cellular surface. SPAM1 encodes for a  
288 hyaluronidase located on the human sperm surface that enables sperm to penetrate through the  
289 hyaluronic acid-rich envelope of the oocyte. AKR1C1 belongs to a superfamily of aldo-keto  
290 reductases and catalyzes the reaction of progesterone to the inactive form 20-alpha-hydroxy-  
291 progesterone.

292 The quality control of the alignments which involve the removal of bad quality regions from  
293 the computation of the evolutionary rates might have led to an underestimation of the positive  
294 selection events, however it guarantees the reliability of the events found.

## 295 **Functional classes**

296 Beside the evolution of specific genes under positive selection, we investigated different  
297 levels of selective constraint between functional classes by comparing evolutionary rates of genes  
298 participating in pathways performing different functions. A Kruskal-Wallis (KW) test was used to  
299 test differences in evolutionary rates between genes belonging to different functional classes of  
300 pathways. For both ontology-based and compound-based classification, we find significant  
301 differences among different functional classes in the evolutionary rates  $dN$ , and  $dN/dS$  (with  $dS$   
302 close to significance).

303 When we consider the ontology-based classification (supplementary Fig S1), differences in  
304  $dN/dS$  reveals relaxed constraints (high  $dN/dS$  values) for external routes (“Detoxification”), and  
305 strong constraints (low  $dN/dS$ ), for routes of the core metabolism (“Generation of precursor  
306 metabolites”). We also find that biosynthesis routes are more constrained than degradation ones.

307 These differences in the strength of purifying selection can reflect the need of making the  
308 biosynthesis of very specific metabolites, but degradation of a broad range of external compounds,  
309 most likely unknown and toxic.

310 When we consider the compound-based classification (supplementary Fig S2), values of  
311  $dN/dS$  separate those with highest values, Steroid, Secondary metabolism and Detoxification, and  
312 those with the lowest, mainly Glycolysis/TCA/PentoseP, which corresponds to the inner core of the  
313 metabolic network. In particular, the detoxification class, the one with the highest  $dN/dS$ , contains  
314 pathways with enzymes able to recognize a broad range of metabolites. Thus, both classification  
315 schemes show that genes participating in peripheral routes have evolved under relaxed constraint,  
316 while stronger selective constraint has acted on the genes whose encoded enzymes have roles within  
317 the central metabolism.

318 From a conceptual point of view, traditionally metabolism has been regarded as a series of  
319 layers of complexity, from central pathways involved in basic energy transactions and the  
320 generation of intermediate precursors, followed by a tier of almost universal biosynthetic pathways  
321 that use a few of those precursors to generate biomass components, and, finally, some processes  
322 connected to central intermediates that generate a diversity of metabolites usually related to  
323 behavioral or environmental cues, and showing a more restricted phylogenetic distribution, also  
324 known as secondary metabolism. Theoretical approaches based on graph theory support this  
325 classical image of metabolic organization (Guimerà and Amaral 2005; Noor et al 2010). Thus, we  
326 grouped the functional classes into three main groups according to the layer of the global  
327 metabolism in which they operate: the inner core of intermediary metabolism comprises classes of  
328 Glycolysis/TCA/PentoseP and Polysaccharides; the second layer of intermediary metabolism with  
329 Membrane Lipids, Nucleotide, Fatty acid/TAG, Cofactor, Fatty Acid/hormone, and Amino acid;  
330 and the outer layer of metabolism comprises the classes of Steroid, Secondary Metabolism and  
331 Detoxification. When we compare the evolutionary rates of these classes through a KW test we find  
332 highly significant differences with a clear gradient of selective constraints in which central routes of  
333 the core metabolism are more constrained (lower  $dN$  and  $dN/dS$ ) than the ones in the second layer  
334 which, in turn, are more constrained than those of the more peripheral layer (Fig 2 and  
335 supplementary Fig 3). Pairwise comparisons hold significant after correcting for multiple testing ( $P$   
336  $< 0.001$ ). Figure 2 clearly shows the steep gradient of selective pressures with genes of the central  
337 metabolism under the stronger selective constraint and genes of the peripheral routes under relaxed  
338 selective constraint.

339 **Presence/Absence of Isoenzymes**

340           Given that roughly 36% of the reactions are catalyzed by more than one enzyme (different  
341 enzymes, encoded by different genes, able to catalyze the same reaction or isoenzymes) we  
342 compared the selective pressures that have acted on genes that encode for unique enzymes, to that  
343 of genes that encode for enzymes for which isoenzymes exist. The existence of isoenzymes  
344 indicates that alternative proteins could be recruited to perform the same metabolic function,  
345 whereas the presence of a unique enzyme is critical for their specific metabolic function to be  
346 served. Interestingly, we find no difference in selective constraint between these two classes of  
347 genes. A Mann-Whitney U test shows no significant differences:  $P=0.066$  for  $dN/dS$ ,  $P=0.109$  for  
348  $dN$  and  $P=0.668$  for  $dS$ . This result shows that sequence properties of isoenzymes do not differ  
349 from those of the rest of the enzymes; they cannot be considered simply as redundant.

### 350           **Evolutionary Rates and Topological Properties**

351           In order to investigate whether and how the organization into metabolic networks imposes  
352 constraints on the evolution of the enzyme-coding genes, we carried out automated linear modeling  
353 to reveal possible linear relationships between evolutionary rates and topological features of  
354 reactions (Table 1). Among the topological features that can be associated to each node and that  
355 summarize aspects of the node's position within the network, we first considered four centrality  
356 measures: (i) in-degree centrality, which is indicative of the number of incoming links pointing to a  
357 node; (ii) out-degree centrality, which is indicative of the number of outgoing links stemming from  
358 a node; (iii) betweenness centrality, which is indicative of the importance of a node in linking parts  
359 of the networks; and (iv) closeness centrality, which is indicative of whether a node lies in the  
360 central or peripheral part of the network. In this analysis, pathways with the category “one-reaction”  
361 are excluded, given that topological measures by definition cannot be computed. In the multivariate  
362 statistical analysis we included three sequence features of the genes that are known to influence  
363 evolutionary rates and thus have to be taken into account when analyzing variations in evolutionary  
364 rates. These three sequence features are: (i) ENC, the effective number of codons, which quantifies  
365 codon bias and is correlated with expression levels; (ii) length of the coding sequence (CDS) of the  
366 gene; and (iii) CG content of the CDS.

367           As seen in Table 1, synonymous substitution rates show significant linear relationships only  
368 with sequence features (codon bias, sequence length and CG content), while no significant  
369 correlation is found with any of the topological parameters. This implies that, as expected, neutral  
370 evolution (evolution at synonymous sites) is only affected by the nucleotide composition of the  
371 sequence itself and not by the position of the gene in the network. On the contrary, in the case of  
372 functional evolution (evolution at non-synonymous sites and  $dN/dS$ ) a significant linear relationship  
373 is found with topological parameters, showing that the evolutionary rates suffer the influence of the

374 position and the role of gene products within the pathways. In particular a highly significant  
375 negative correlation is found between both  $dN$  and  $dN/dS$  and in-degree centrality, meaning that  
376 genes that have high in-degree centralities are highly constrained in their evolution with a strong  
377 purifying selection, while genes that have low in-degree centralities are free to evolve under relaxed  
378 constraints and accumulate non-synonymous substitutions at a faster rate. This result holds for  
379 pathways of different topologies regardless of whether the structure presents loops or not.

### 380 **Position along the Pathway: Top/Intermediate/Bottom Classification**

381 In order to analyze the possible relationship of topological centrality measures and the  
382 position within the specific metabolic pathways, we took advantage of the physiological  
383 directionality of metabolic pathways and we generated a new categorical variable to account for  
384 position. Three different classes of reactions have been defined according to their position within  
385 the pathway: reactions that catalyze the first enzymatic step in the pathway (top position); reactions  
386 that catalyze the last step in the pathway (bottom position); all the in-between steps are assigned to  
387 same class (intermediate). A fourth class has been introduced for reactions that catalyze the first and  
388 last step at the same time, being, for example the only reaction of one branch of a branched pathway  
389 that directly converts the initial substrates into the final products. Genes are assigned to the class of  
390 the reaction catalyzed by the enzyme they encode. It should be noted that this classification on  
391 position is correlated with in-degree centrality: nodes at top positions are those with no incoming  
392 links (in-degree equal to 0) and those at bottom positions are defined solely on the basis of out-  
393 degree (out-degree equal to 0). This new variable, even if correlated with in-degree, encodes  
394 different positional information that is not fully captured by the in-degree centrality.

395 We analyzed whether genes whose encoded enzymes catalyze reactions belonging to these  
396 four classes have evolved under different selective pressures. Evolutionary rates for these four  
397 classes are shown in Fig 3a and supplementary Fig 4a. The statistical significances of their  
398 differences have been assessed through Kruskal-Wallis, which show that there are significant  
399 differences between the four considered classes in  $dN/dS$  ( $P=0.001$ ) and  $dN$  ( $P=0.001$ ) while no  
400 significant differences are found in  $dS$  ( $P=0.151$ ). Both cases of  $dN/dS$  and  $dN$  pairwise  
401 comparisons show that the intermediate class has a lower  $dN$  and  $dN/dS$  than the top (0.022 for  
402  $dN/dS$  and 0.010 for  $dN$ ) and one-step (0.010 for  $dN/dS$  and 0.005 for  $dN$ ) classes. This means that  
403 genes whose encoded enzymes catalyze reactions at top positions have undergone more relaxed  
404 evolution and faster non-synonymous substitution rates than genes at intermediate position. Genes  
405 belonging to the one-step class have the highest evolutionary rates.

406 Given that the last three classes (top, intermediate, and bottom) constitute an ordered variable



407 of the position along the pathway, we carried out a trend test to test whether a linear relationship  
408 exists of the evolutionary rates and these positional classes. A significant linear relationship is  
409 found for  $dN$  for the three classes of top-intermediate-bottom with P-value of 0.008. Non-significant  
410 P-values for the linear relationship are instead found for  $dN/dS$  (0.072) and for  $dS$  (0.481). This  
411 means that a statistically significant gradient in the rate of non-synonymous substitution is found  
412 along metabolic pathways with genes in top positions having experienced faster non-synonymous  
413 substitution rates.

414 Given that the top/bottom position implies directionality for the pathway, we repeated the  
415 analysis in the subset of 208 pathways that have no loops thus have a marked directional structure  
416 (Fig 3b and supplementary fig 4b). As before, KW tests show that there are significant differences  
417 between  $dN/dS$  (P=0.023) and  $dN$  (P=0.005) between the four classes considered, while no  
418 significant differences are found in  $dS$  (P=0.300). When looking at pairwise comparisons we find  
419 that  $dN/dS$  of genes of the one-step class have a significantly higher  $dN/dS$  than those belonging to  
420 the intermediate (P=0.035) and to the bottom (P=0.019) class, and the  $dN$  of genes belonging to the  
421 one-step class are significantly different from  $dN$  of the remaining three classes: top (P=0.034),  
422 intermediate (P=0.006), bottom (P=0.004).

423 In summary, the stringent KW test clearly highlighted differences between the rates of  
424 functional evolution of the genes belonging to the one-step class and those belonging to the other  
425 classes, pointing to their relaxed evolutionary constraint. This implies a gradient of non-  
426 synonymous substitution rates along metabolic pathways with genes at top-positions allowed to  
427 evolve at a faster rate than genes at intermediate and bottom positions, and with genes at  
428 intermediate and bottom positions being more tightly constrained to fix non-synonymous  
429 substitutions at a slower rate.

### 430 **Topological Measures of Positive Selected Genes**

431 We measured the differences in the mean of the four centrality measures (in-degree, out-  
432 degree, closeness and betweenness) between genes with signatures of positive selection and the  
433 whole set of metabolic genes. We tested two sets: genes under positive selection with and without  
434 multiple testing correction. When only the six genes under positive selection after multiple testing  
435 correction were considered, no statistical significance is observed, even though genes under positive  
436 selection show higher out-degree and higher closeness than the average (0.33 vs. 0.22 for the out-  
437 degree and 0.38 vs. 0.28 for the closeness). Given the small number of positively selected genes (six  
438 genes), this same analysis was also repeated with all genes (49 genes) that have a p-value smaller  
439 than 0.05 in the positive selection test before the multiple test correction. The aim of this analysis is

440 to test if there is any difference in the centrality measures values for the genes that belong to the tail  
441 of the positive selection test distribution. When these two groups are compared, higher out-degree  
442 (one tail permutation test,  $P = 0.0084$ ) and higher closeness (one tail permutation test,  $P = 0.0116$ ,)  
443 values are found for positively selected genes with an increase of 32% in the average value of out-  
444 degree and of 21% in closeness in genes under positive selection compared to the whole set of  
445 metabolic genes. This result shows that the tail of positive selection distribution is enriched by  
446 genes with higher out degree and higher closeness.

447         These results indicate that genes encoding enzymes with a greater number of reactions that  
448 make use of their products in the human metabolic pathways are more likely to present signals of  
449 positive selection than those with fewer enzymes using their products. Genes under positive  
450 selection have also higher closeness than the average and hence shorter path lengths to other nodes  
451 in the pathway.



452           **DISCUSSION**

453           Linking the action of natural selection in the evolution of genes to the network structure and  
454 topology is an interesting approach to understand the constraints that the network structure may  
455 have on the evolution of complex molecular systems such as metabolism. Here, we have carried out  
456 a comprehensive molecular evolutionary study of human metabolism by investigating the selective  
457 pressures that acted on the enzyme-coding genes during the divergence of primates and rodents, and  
458 their relationships with functional and topological features of the pathways that constitute the  
459 system. Extensive studies have made possible the reconstruction of the biochemical pathways that  
460 constitute the metabolism; here we use this information to investigate the influence of the local  
461 network topology of the metabolic pathways in its evolutionary behavior by analyzing the  
462 distribution on the network of selective forces, be they in form of innovations (positive or adaptive  
463 selection) or in the strength of conservation (purifying selection).

464           The analysis of individual metabolic pathways instead of the whole metabolic network has  
465 several advantages: i) it allows the study of the influence onto the evolution of metabolic genes of  
466 their local relevant environment, that is, the context of the gene products in which the metabolic  
467 task is achieved; ii) it allows to separately study the functional units responsible for the different  
468 metabolic tasks, classify and compare them, and study the distribution of selective pressures within  
469 each functional unit; these functional units are particularly relevant because are likely to  
470 approximate the “molecular phenotypes” targeted by selection; and iii) it allows an intermediate  
471 analysis between the single enzyme and the whole metabolic network in the line of considering the  
472 hierarchical and topological structure of the pathways. However, the partitioning of the metabolic  
473 network into pathways is a somehow arbitrary process, the most arbitrary decision being the  
474 definition of pathway boundaries. Criteria for the definition of a pathway have been analyzed and  
475 compared (Caspi et al 2013; Green and Karp 2006) and the best collection of pathways available for  
476 human metabolism is comprised in the HumanCyc database (Romero et al. 2004; Caspi et al 2014).  
477 In HumanCyc, the criteria used for pathway definition are clearly stated and uniformly applied to  
478 the whole database (Caspi et al 2013). Importantly, the HumanCyc/MetaCyc approach of defining  
479 pathway boundaries through a multi-organism meta-metabolism implicitly introduces phylogenetic  
480 information and thus, pathways defined therein represent the best approximation of the functional  
481 units targeted by selection.

482           The final dataset under study was composed of 927 genes, whose products are integrated in  
483 310 pathways. The species that have been considered are human, chimpanzee, gorilla, orangutan,  
484 mouse and rat, and thus the analysis embraces the divergence time of both primates and rodents.  
485 The tools for detecting positive selection and for measuring the strength of purifying selection (see

486 methods) are based on the amino acid impact of nucleotide changes.

487 The detection of genes that underwent positive selection, and that are thus at the base of  
488 innovative changes, have resulted in a very small number of genes, six out of the 927 genes. These  
489 genes are: CYP2E1, a member of the cytochrome 450 family; HDC, a histidine decarboxylase;  
490 CES1, a carboxylesterase; DPM2, a subunit of the dolichol-phosphate mannose synthase complex;  
491 SPAM1, a hyaluronidase; and AKR1C1 an aldo-keto reductase. Two of the six genes that show  
492 sequence signature of positive selection, CYP2E1 and CES1, encode for detoxification enzymes  
493 and contribute to the solubility of molecules that must be expelled from the cell as fast as possible.  
494 Therefore, response to xenobiotic molecules has likely been a target of adaptive selection during  
495 primate and rodent divergence.

496 The main selective force in metabolism is the maintenance of the system through purifying  
497 selection; we have calculated this strength for each gene and analyzed the context according to  
498 biochemical and network properties. We observed a steep gradient of selective constraints that goes  
499 from genes serving functions within the inner core of intermediary metabolism (the most  
500 constrained), through those of a second layer of intermediary metabolism, to the outer peripheral  
501 layer of metabolism (*i.e.* secondary metabolism), which shows the most relaxed selective constraint.  
502 We have shown that the stronger selective constraint has acted on the genes whose encoded  
503 enzymes have roles within the inner core of metabolism; pathways comprised in this inner layer are  
504 involved in the transformations of small precursor metabolites for cell maintenance. These  
505 pathways are the oldest, the more phylogenetically conserved (Peregrin-Alvarez et al. 2003) and are  
506 enriched in enzymes exhibiting more substrate specificity (Nam et al. 2012). Accordingly, we have  
507 found that enzymes participating in more peripheral routes are evolutionarily less constrained and  
508 more plastic, having experienced faster functional evolution. Generalist enzymes, able to cope with  
509 a vast diversity of possible small molecular structures, populate pathways of this outer layer. The  
510 strategy of adopting generalist enzymes at the outer interface of metabolism may be a more efficient  
511 strategy than to develop a specific enzyme for each type of possible metabolite that may be present  
512 in the environment. Indeed, a global analysis of kinetic parameters of several thousands of known  
513 enzymes showed that central metabolism enzymes perform better in terms of catalytic constants  
514 (*i.e.* higher  $k_{cat}$  and  $k_{cat}/K_M$ ) than secondary metabolism enzymes (Bar-Even et al 2011). In line with  
515 the authors' suggestion, we have been able to prove that there is a stronger selective pressure on  
516 central metabolic enzymes, probably due to the need of maintaining the catalytic parameters that  
517 allow higher fluxes in central pathways, in comparison to those operating at lower fluxes and less  
518 specificity in secondary metabolism (Bar-Even et al 2011).

519 Isoenzymes are of special interest because they provide material for metabolic evolutionary

520 innovation through sub- or neo-functionalization (Innan and Kondrashov 2010). Here we have  
521 found no differences in evolutionary rates between isoenzymes and the rest of the enzymes; no  
522 differences in their connectivities were found in the global metabolic network of *E.coli* (Light et al.  
523 2005). Thus, both the sequence and the topological properties of isoenzymes do not differ from  
524 those of the rest of the enzymes. Selective constraint acting with the same strength onto these two  
525 classes of genes suggests that what may seem like alternative enzymes for the same metabolic  
526 function, are, indeed, equally “essential”, and the functional degeneracy is only apparent.  
527 Isoenzymes are likely to be essential to their function either through regulation, differential  
528 expression in time (different developmental stages), or in space, displaying their function in  
529 different cellular compartments or tissues. The study of evolutionary pressures over gene sequences  
530 has clearly pointed to lack of functional degeneracy for isoenzymes, given that redundancy leaves  
531 clear detectable footprints in terms of acceleration of substitution rates, as for example in the case of  
532 paralogous gene copies just after the duplication event (Innan and Kondrashov 2010).

533 To assess the influence of system properties on gene evolution we have used the local  
534 topology of the metabolic network. Among the many possible ways of representing metabolic  
535 pathways through graph structures, we have encoded pathways as reaction graphs, a type of  
536 representation in which nodes represent reactions; hence they can be directly associated to the genes  
537 that catalyze the reactions. In this representation edges represent metabolites (reaction substrate and  
538 products) and here we have considered their direction. So in our representation edges are indeed  
539 arrows and the resulting graph is a directed graph. By encoding metabolic pathways through  
540 directed graphs, we are able to take into account the physiological direction of the reactions in the  
541 cell.

542 Even in absence of specific information about the metabolic pathways for all the considered  
543 species, the relatively shallow phylogenetic divergence considered and the well-known  
544 conservation of metabolism among mammals ensures the use of a unique structure of pathways and  
545 function of all enzymes. The influence of the local network topology over gene's evolution was  
546 investigated for both positive and purifying selection.

547 The influence of the local network topology over gene's evolution had been previously  
548 investigated in few cases of specific metabolic pathways. The comprehensive analysis carried out  
549 here allowed revealing that this influence is pervasive and general patterns can be found. When  
550 positive selection has been considered we have found that positively selected genes have higher out-  
551 degree centralities than non-adaptive genes. Genes with high out-degree are not involved in the  
552 production of the final products of the metabolic task and, at the same time, are those whose  
553 products are subsequently transformed by a high fraction of different reactions in the pathway. Here

554 we see that genes in these positions are preferentially targeted by adaptive evolution.

555 When purifying selection has been considered, in-degree centrality has been identified as the  
556 strongest topological factor constraining metabolic gene's sequence evolution. Genes characterized  
557 by higher in-degree connectivities have evolved under stronger purifying selection. Within the  
558 context of biochemical reaction graphs in which each node represents a biochemical reaction, in-  
559 degree reflects the number of reactions that directly precede the given one, that is, the number of  
560 reactions that produce metabolites that are then taken as substrates by the given reaction. This  
561 means that in-degree centrality is higher for reaction with many incoming links and lower for  
562 reactions with few incoming links.

563 Besides the encoding of topological information through centrality measures we also used  
564 topological features that encode the position along the pathway (top, intermediate and bottom) of  
565 each enzyme. When this topological information was considered for plant biosynthetic pathways  
566 (Rausher et al. 1999; Lu and Rausher 2003; Rausher et al. 2008; Livingstone and Anderson 2009;  
567 Ramsay et al. 2009), a progressive relaxation of selective constraint along metabolic pathways was  
568 found. Here we found an opposite gradient when the whole set of human metabolic pathways were  
569 analyzed during the divergence of primates and rodents, with genes at top positions being under  
570 more relaxed constraint and genes at bottom position being under stronger selective constraint. Thus  
571 relaxed evolutionary forces at top positions allow broader evolutionary changes while, at the  
572 bottom, strong selective constraint narrows the allowed changes in functional variation, according  
573 to a funnel like model. This funnel like distribution of selective pressures along positions in the  
574 pathway is a general pattern found throughout the considered metabolic pathways. This result is  
575 consistent with the results obtained in the N-glycosylation pathway (Montanucci et al 2011) where  
576 genes at downstream positions of the pathways were found to be under stronger selective constraint  
577 than genes located at upstream (top) positions in the pathway which in turn had undergone more  
578 relaxed evolution. For metabolic routes that are directly connected with external environment,  
579 enzymes at top positions are usually more generalists in response to the need of using a broad  
580 diversity of possible metabolic material, while those at the bottom positions are more specialized, in  
581 response to the need of producing very specific products. It can be speculated that the results  
582 obtained here may reflect the relevance of accuracy in the synthesis of final metabolic products.

583 The comprehensive analysis of the whole set of human metabolic pathways revealed that both  
584 adaptive and purifying selection are not evenly distributed among the genes encoding the enzymes  
585 involved in metabolic pathways. Adaptive selection has targeted a small number of genes during the  
586 divergence of primates and rodents and adaptive genes are mainly involved in detoxification  
587 functions. Purifying selection has been a pervasive selective force dominating the evolution of

588 metabolic genes during the divergence of primates and rodents. It has acted with different strengths  
589 according to the layer of metabolism over which it acts, with the inner core of metabolism being  
590 strongly conserved and with little or no room left for evolutionary innovation. From these results, it  
591 is tempting to conclude that it is less likely to innovate on pathways that were established in the  
592 early (*i.e.* prokaryotic) stages of evolution and that are involved in the synthesis of a small set of  
593 metabolic precursors linking the synthesis and degradation of essential biomolecules, namely  
594 sugars, lipids, amino acids and nucleotides. A more relaxed selection has been found for enzymes  
595 that manage higher levels of chemodiversity. This is the case of detoxification of xenobiotics or the  
596 biosynthesis of a wide spectrum of secondary metabolites that, by definition, are not directly  
597 involved in the survival of the organism, but rather in its ecological and behavioral traits.

598           **ACKNOWLEDGEMENTS**

599           Authors would like to acknowledge Dr Peter Karp and Dr Ron Caspi for their support and  
600 help with data in HumanCyc database.

601

602           **Compliance with Ethical Standards**

603           Conflict of Interest: The authors declare that there is no conflict of interest

604           Research involving Human Participants and/or Animals: The research does not involve  
605 human or animal participants. It is solely based on databases.

606           Informed consent: no need of informed consent.

607

608 **TABLES**

609 **Table 1.** Results for the three independent runs of automated linear modeling with evolutionary measures as dependent  
 610 variable for the 275 base pathways. The following variables have been considered by the model: 3 gene sequence  
 611 properties, effective number of codons (ENC), gene length (Length) and CG content (CG); and 4 topological  
 612 centralities: closeness, betweenness and in-degree and out-degree centralities. Beta coefficients and P-values (between  
 613 brackets) are reported; significant values according to a threshold of 0.05 are presented in bold.

|              | ENC                                    | Length                                 | CG                                    | Closeness         | Betweenness       | In-degree                              | Out-degree        |
|--------------|----------------------------------------|----------------------------------------|---------------------------------------|-------------------|-------------------|----------------------------------------|-------------------|
| <i>dN/dS</i> | <b>0.003</b><br>( <b>&lt;0.0001</b> )  | <b>-0.000</b><br>( <b>&lt;0.0001</b> ) | 0.002<br>(0.958)                      | -0.056<br>(0.071) | -0.017<br>(0.225) | <b>-0.035</b><br>( <b>&lt;0.0001</b> ) | 0.038<br>(0.246)  |
| <i>dN</i>    | 0.000<br>(0.901)                       | <b>-0.000</b><br>( <b>&lt;0.0001</b> ) | 0.022<br>(0.529)                      | -0.019<br>(0.502) | -0.021<br>(0.111) | <b>-0.030</b><br>( <b>&lt;0.0001</b> ) | 0.011<br>(0.703)  |
| <i>dS</i>    | <b>-0.025</b><br>( <b>&lt;0.0001</b> ) | <b>-0.000</b><br>( <b>&lt;0.0001</b> ) | <b>0.549</b><br>( <b>&lt;0.0001</b> ) | 0.021<br>(0.866)  | 0.054<br>(0.339)  | -0.019<br>(0.573)                      | -0.037<br>(0.779) |

614

615

616

617



618 **FIGURES**

619

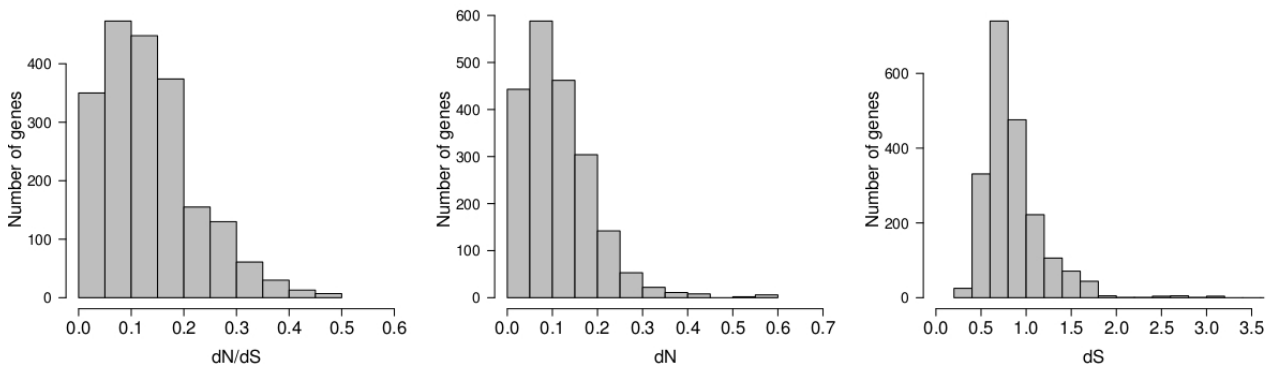

620

621 **Figure 1** Distribution of the evolutionary rates ( $dN/dS$ ,  $dN$  and  $dS$ ) for the 927 metabolic genes.

622

623

624

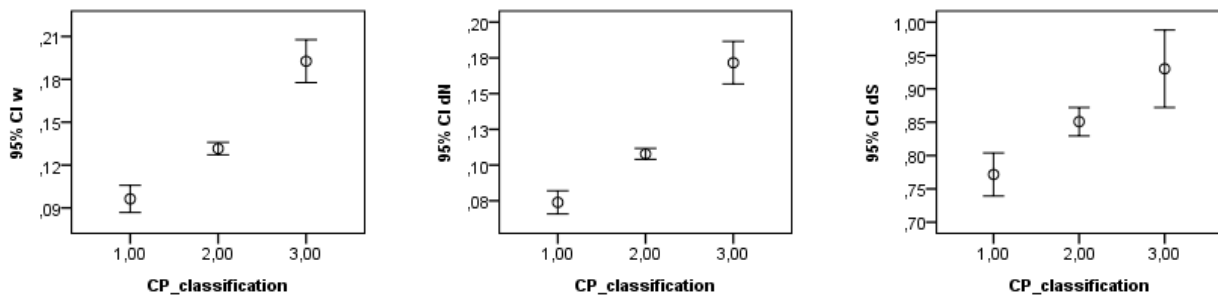

625

626 **Figure 2** Graph representing  $dN/dS$ ,  $dN$  and  $dS$  among genes belonging to different functional classes. Class  
627 1 comprises the inner metabolism (Glycolysis/TCA/PentoseP, Polysaccharides), class 2 comprises the second  
628 layer (Membrane Lipids metabolism, nucleotide metabolism, Fatty acid/TAG, Cofactor, Fatty  
629 Acid/hormone, and Aminoacid) while class 3 comprises the outer layer of cell metabolism (Steroid,  
630 Secondary Metabolism and Detoxification).

631

632

633

634

a)

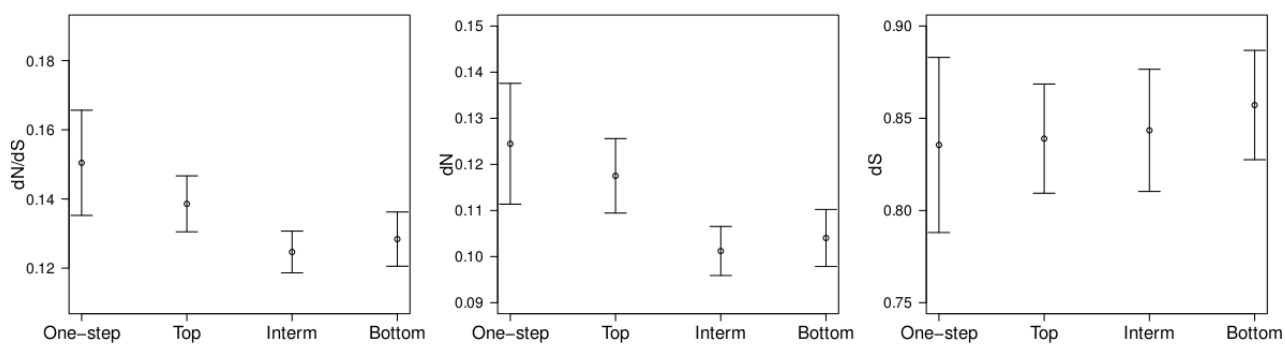

b)

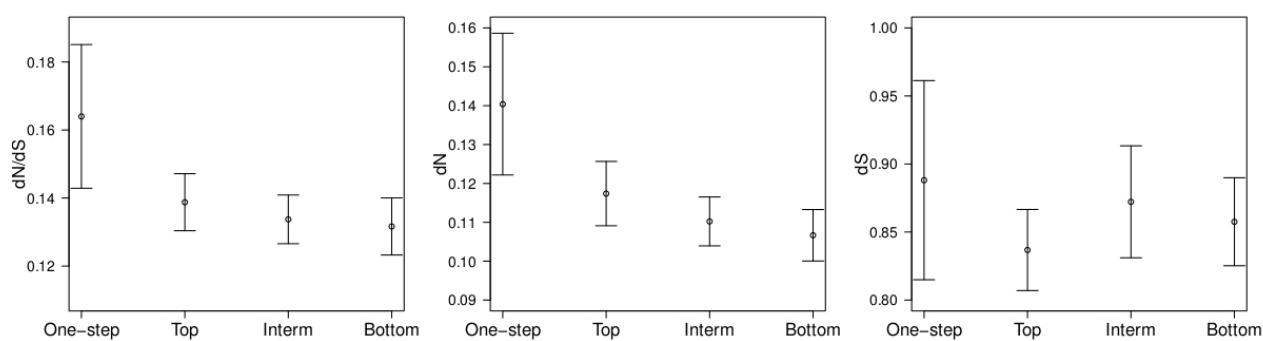

635 **Figure 3 a)** Graph representing  $dN/dS$ ,  $dN$  and  $dS$  among genes whose position within the pathway belongs  
636 to four classes (one-step, top, intermediate, bottom positions) for the 275 base pathways. **b)** The same for  
637 the 208 base pathways with no loops. Dots show the mean  $\pm$  2 standard error (SE).

638

639           **References**

- 640           Alves R, Chaleil RA, Sternberg MJ. (2002) Evolution of enzymes in metabolism: a network  
641 perspective. *J Mol Biol.* 320(4):751-70. Erratum in: (2002) *J Mol Biol* 324(2):387.
- 642           Bar-Even A, Noor E, Savir Y, Liebermeister W, Davidi D, Tawfik DS, Milo R. (2011) The  
643 moderately efficient enzyme: evolutionary and physicochemical trends shaping enzyme parameters.  
644 *Biochemistry* 50(21):4402-10.
- 645           Birney E, Clamp M, Durbin R. (2004) GeneWise and Genomewise. *Genom Res.* 14(5):988-  
646 995.
- 647           Caspi R, Dreher K, Karp PD. (2013) The challenge of constructing, classifying, and  
648 representing metabolic pathways. *FEMS Microbiol Lett.* 345(2):85-93.
- 649           Caspi R, Altman T, Billington R, Dreher K, Foerster H, Fulcher CA, Holland TA, Keseler IM,  
650 Kothari A, Kubo A, Krummenacker M, Latendresse M, Mueller LA, Ong Q, Paley S, Subhraveti P,  
651 Weaver DS, Weerasinghe D, Zhang P, Karp PD. (2014) The MetaCyc database of metabolic  
652 pathways and enzymes and the BioCyc collection of Pathway/Genome Databases. *Nucleic Acids*  
653 *Res.* 42(Database issue):D459-71.
- 654           Duarte, N. C., S. A. Becker, N. Jamshidi, I. Thiele, M. L. Mo, T. D. Vo, R. Srivas, and B. Ø.  
655 Palsson. 2007. Global reconstruction of the human metabolic network based on genomic and  
656 bibliomic data. *Proceedings of the National Academy of Sciences, U.S.A.* 104:1777-1782.
- 657           Fani R and Fondi M. (2009) Origin and evolution of metabolic pathways. *Phys Life Rev.*  
658 6(1):23-52.
- 659           Grassi L and Tramontano A. (2011) Horizontal and vertical growth of *S. cerevisiae* metabolic  
660 network. *BMC Evol Biol.* 11:301.
- 661           Green ML, Karp PD. (2006) The outcomes of pathway database computations depend on  
662 pathway ontology. *Nucleic Acids Res.* 34(13):3687-97.
- 663           Greenberg AJ, Stockwell SR, Clark AG. (2008) Evolutionary constraint and adaptation in the  
664 metabolic network of *Drosophila*. *Mol Biol Evol.* 25:2537-2546.
- 665           Guimerà R, Amaral LAN. (2005). Functional cartography of complex metabolic networks.  
666 *Nature* 433:895-900.
- 667           Hudson CM, Conant GC. Expression level, cellular compartment and metabolic network

- 668 position all influence the average selective constraint on mammalian enzymes. *BMC Evol Biol.*  
669 2011;11:89.
- 670 Innan H, Kondrashov F. (2010) The evolution of gene duplications: classifying and  
671 distinguishing between models. *Nat Rev Genet* 11(2):97-108.
- 672 Jensen RA. (1976) Enzyme recruitment in evolution of new function. *Annu Rev Microbiol.*  
673 30:409-25.
- 674 Lazcano A, Díaz-Villagómez E, Mills T, Oró J. (1995) On the levels of enzymatic substrate  
675 specificity: implications for the early evolution of metabolic pathways. *Adv Space Res.* 15(3):345-  
676 56.
- 677 Light S and Kraulis P . (2004) Network analysis of metabolic enzyme evolution in  
678 *Escherichia coli*. *BMC Bioinformatics* 5:15.
- 679 Light S, Kraulis and P Elofsson A. (2005) Preferential attachment in the evolution of  
680 metabolic networks. *BMC Genomics* 6:159.
- 681 Livingstone K, Anderson S. (2009) Patterns of variation in the evolution of carotenoid  
682 biosynthetic pathway enzymes of higher plants. *J Hered.* 100(6):754-61
- 683 Lu Y, Rausher MD. (2003) Evolutionary rate variation in anthocyanin pathway genes. *Mol*  
684 *Biol Evol.* 20:1844-53.
- 685 Ma, H., A. Sorokin, A. Mazein, A. Selkov, E. Selkov, O. Demin, and I. Goryanin. 2007. The  
686 Edinburgh human metabolic network reconstruction and its functional analysis. *Molecular Systems*  
687 *Biology* 3:135.
- 688 Ma HW, Zeng AP . (2003a) The connectivity structure, giant strong component and centrality  
689 of metabolic networks. *Bioinformatics* 19:1423-1430.
- 690 Ma HW, Zeng AP . (2003b) Reconstruction of metabolic networks from genome data and  
691 analysis of their global. *Bioinformatics* 19:270-277.
- 692 Milo R, Last RL. (2012) Achieving diversity in the face of constraints: lessons from  
693 metabolism. *Science* 336(6089):1663-7.
- 694 Montañez R, Medina MA, Solé RV, Rodríguez-Caso C. (2010) When metabolism meets  
695 topology: Reconciling metabolite and reaction networks. *BioEssays* 32:246-256.
- 696 Montanucci L, Laayouni H, Dall'Olio GM, Bertranpetit J. (2011) Molecular evolution and

- 697 network-level analysis of the N-glycosylation metabolic pathway across primates. *Mol Biol Evol.*  
698 28(1):813-23.
- 699 Nam H, Lewis NE, Lerman JA, Lee DH, Chang RL, Kim D, Palsson BO. (2012) Network  
700 context and selection in the evolution to enzyme specificity. *Science* 337(6098):1101-4.
- 701 Noor E, Eden E, Milo R, Alon U. (2010). Central carbon metabolism as a minimal  
702 biochemical walk between precursors for biomass and energy. *Mol Cell* 39(5):809-20.
- 703 Notredame C, Higgins DG, Heringa J. (2000) T-Coffee: a novel method for multiple sequence  
704 alignments. *J Mol Biol* 302:205-217.
- 705 Peregrin-Alvarez JM, Tsoka S, Ouzounis CA. (2003) The phylogenetic extent of metabolic  
706 enzymes and pathways. *Genome Res.* 13(3):422-7.
- 707 Peretó J. (2011) Origin and evolution of metabolisms. *In: Origins and Evolution of Life. An*  
708 *Astrobiological Perspective* (Gargaud M *et al.* eds.), Cambridge University Press, ch. 18, p. 270-88.
- 709 Peretó J. (2012) Out of fuzzy chemistry: from prebiotic chemistry to metabolic networks.  
710 *Chem Soc Rev.* 41(16):5394-403.
- 711 Ramsay H, Rieseberg LH, Ritland K. (2009) The correlation of evolutionary rate with  
712 pathway position in plant terpenoid biosynthesis. *Mol Biol Evol.* 26:1045-1053.
- 713 Rausher MD, Miller RE, Tiffin P. (1999) Patterns of evolutionary rate variation among genes  
714 of the anthocyanin biosynthetic pathway. *Mol Biol Evol.* 16:266-274.
- 715 Rausher MD, Lu Y, Meyer K. (2008) Variation in constraint versus positive selection as an  
716 explanation for evolutionary rate variation among anthocyanin genes. *J Mol Evol.* 67:137-144.
- 717 Romero P, Wagg J, Green ML, Kaiser D, Krummenacker M, and Karp PD. (2004)  
718 Computational prediction of human metabolic pathways from the complete human genome *Genome*  
719 *Biology* 6:R2 R2.1-17.
- 720 Storey JD. (2002) A direct approach to false discovery rates. *Journal of the Royal Statistical*  
721 *Society, Series B*, 64: 479-498.
- 722 Thiele, I., N. Swainston, R. M. Fleming, A. Hoppe, S. Sahoo, M. K. Aurich, H. Haraldsdottir,  
723 M. L. Mo, O. Rolfsson, and M. D. Stobbe. 2013. A community-driven global reconstruction of  
724 human metabolism. *Nature Biotechnology* 31:419-425.
- 725 Teichmann SA, Rison SC, Thornton JM, Riley M, Gough J, Chothia C. (2001) Small-

726 molecule metabolism: an enzyme mosaic. *Trends Biotechnol.* 19(12):482-6.

727       Teichmann SA, Rison SC, Thornton JM, Riley M, Gough J, Chothia C. (2001) The evolution  
728 and structural anatomy of the small molecule metabolic pathways in *Escherichia coli*. *J Mol Biol.*  
729 311(4):693-708.

730       Vitkup D, Kharchenko P and Wagner A. (2006) Influence of metabolic network structure and  
731 function on enzyme evolution. *Genome Biol.* 7:R39.

732       Yang Z. (2007) PAML 4: phylogenetic analysis by maximum likelihood. *Mol Biol Evol*  
733 24(8):1586-1591.

734       Yčas, M. (1974). On earlier states of the biochemical system. *J Theor Biol* 44:145-60.

735       Zhao J, Yu H, Luo JH, Cao ZW, Li YX. (2006) Hierarchical modularity of nested bow-ties in  
736 metabolic networks. *BMC Bioinformatics* 7:386.

737

## Supplementary Figures

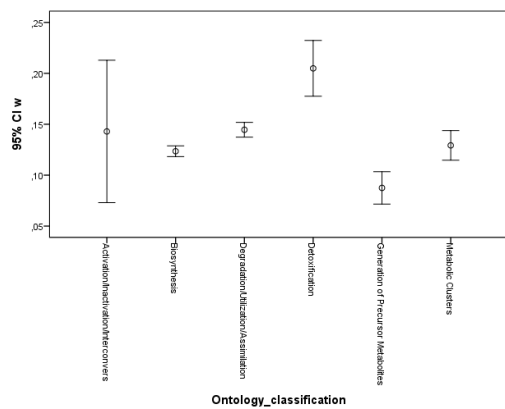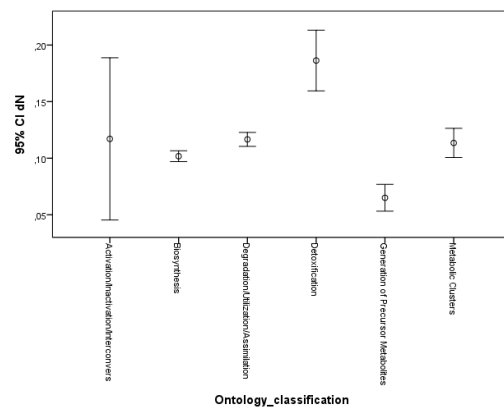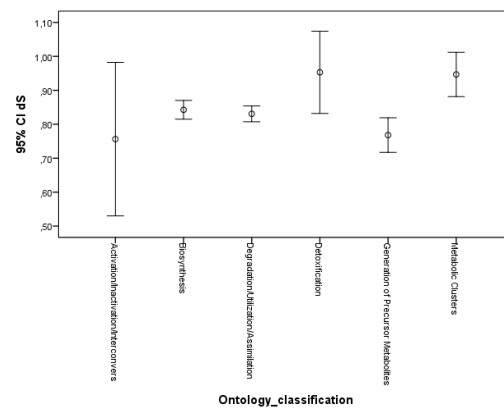

**Supplementary Figure S1** Graph representing  $dN/dS$ ,  $dN$  and  $dS$  among genes belonging to different functional classes according to ontology-based classification.



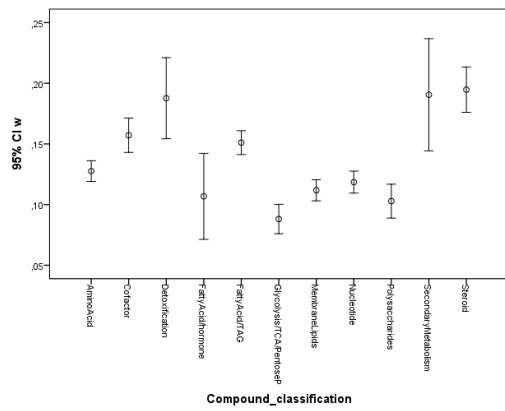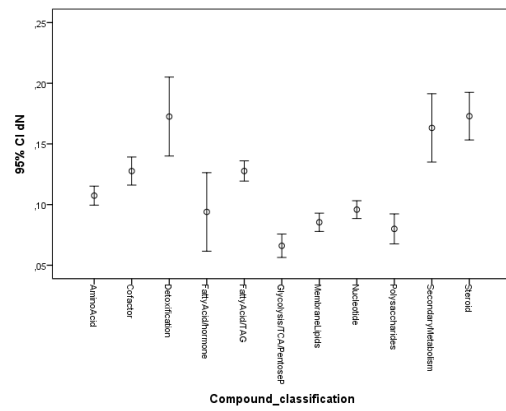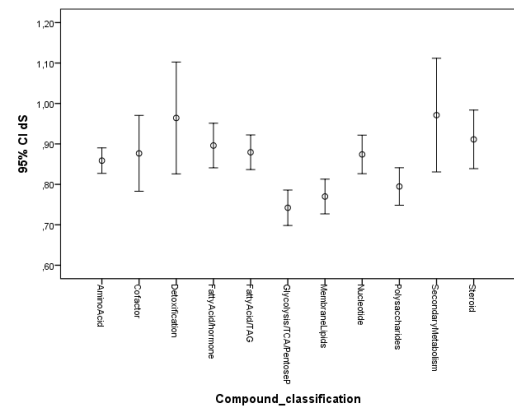

**Supplementary Figure S2** Graph representing  $dN/dS$ ,  $dN$  and  $dS$  among genes belonging to different functional classes according to compound-based classification.

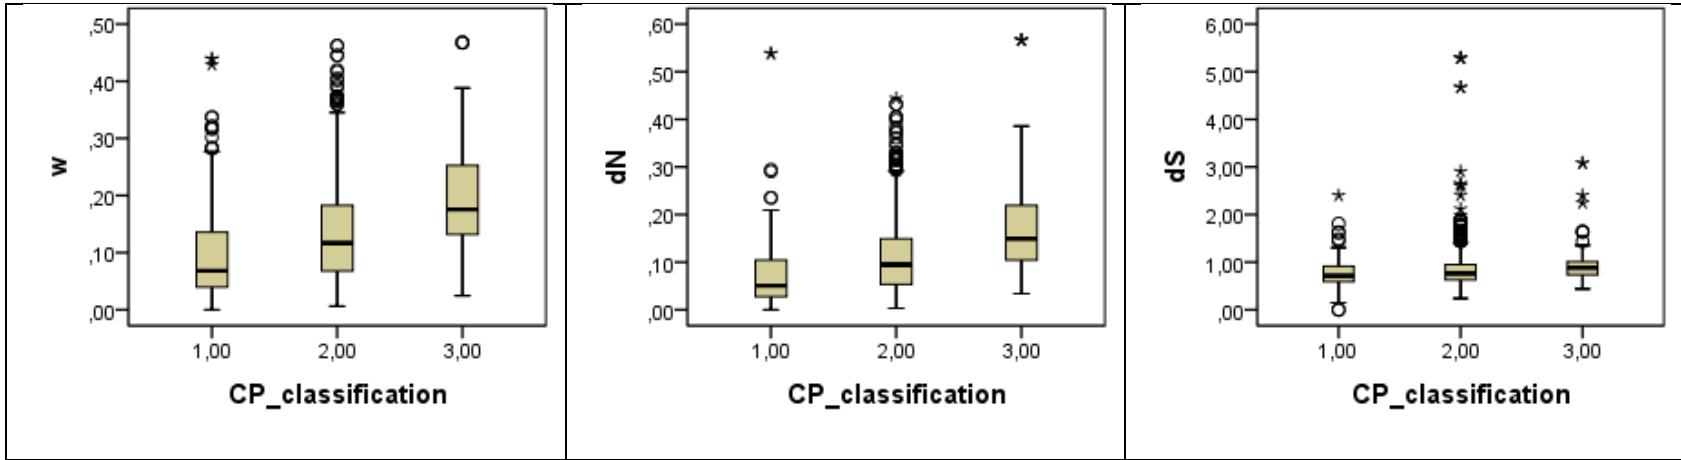

**Supplementary Figure S3** Boxplots representing  $\omega$  ( $dN/dS$ ),  $dN$  and  $dS$  among genes belonging to different functional classes. Class 1 comprises the inner metabolism (Glycosis/TCA/PentoseP, Polysaccharides), class 2 comprises the second layer (Membrane Lipids metabolism, nucleotide metabolism, Fatty acid/TAG, Cofactor, Fatty Acid/hormone, and Aminoacid) while class 3 comprises the outer layer of cell metabolism (Steroid, Secondary Metabolism and Detoxification).. Boxes are 25th and 75th quartiles, black bar within the box represents the median, whiskers indicate minimum and maximum and dots and stars represent most extreme data point higher than 1.5 interquartile range from box.

a)

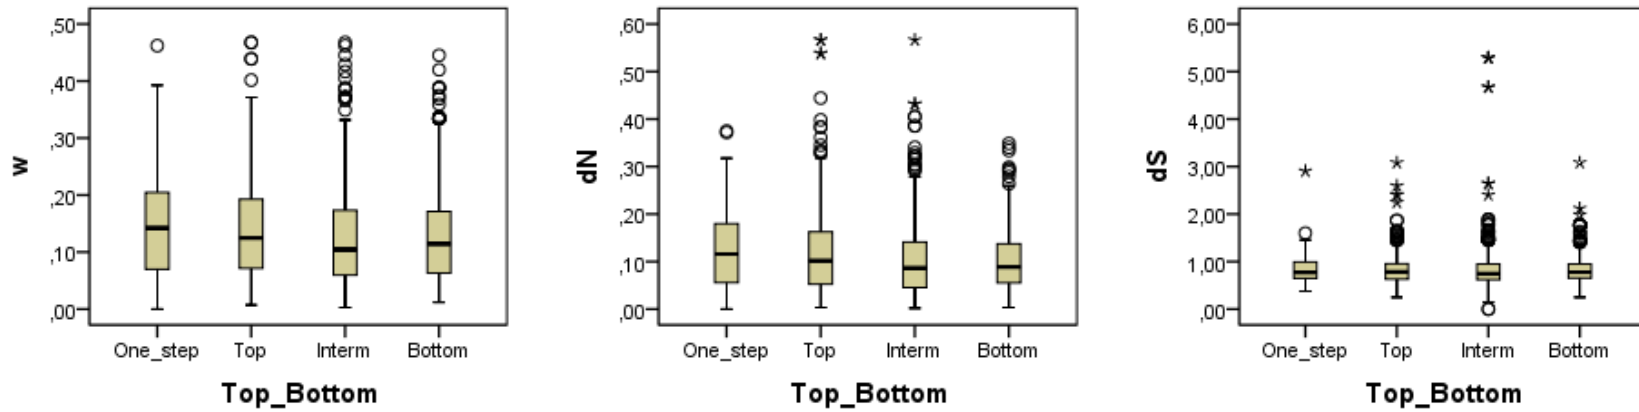

b)

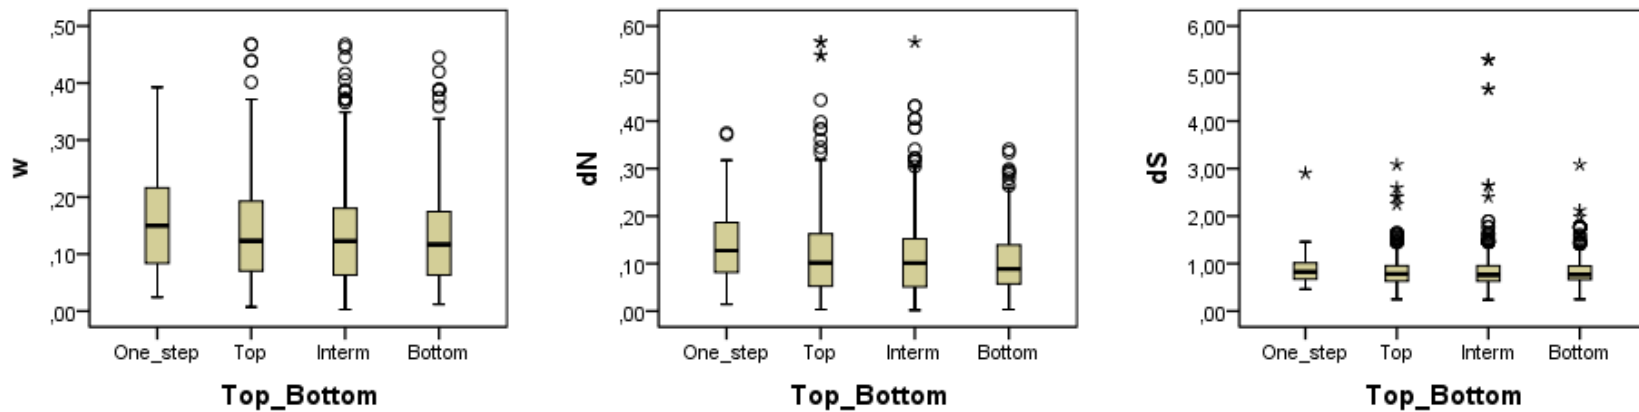

**Supplementary Figure 4** a) Boxplots representing  $dN/dS$ ,  $dN$  and  $dS$  among genes whose position within the pathway belongs to four classes (one-step, top, intermediate, bottom positions) for the 275 base pathways. b) The same for the 208 base pathways with no loops. Dots show the mean  $\pm$  2 standard error (SE). Boxes are 25th and 75th quartiles, black bar within the box represents the median, whiskers indicate minimum and maximum and dots and stars represent most extreme data point higher than 1.5 interquartile range from the box.

**Supplementary Table S1:** List of the 310 pathways, their codes, common names and their classifications.

| <b>PATHWAY CODE</b>        | <b>PATHWAY COMMON NAME</b>                                         | <b>ONTOLOGY-BASED CLASSIFICATION</b> | <b>COMPOUND-BASED CLASSIFICATION</b> |
|----------------------------|--------------------------------------------------------------------|--------------------------------------|--------------------------------------|
| 2PHENDEG-PWY               | phenylethylamine degradation I                                     | Degradation/Utilization/Assimilation | AminoAcid                            |
| ADENOSYLHOMOCYSCAT-PWY     | methionine salvage                                                 | Biosynthesis                         | AminoAcid                            |
| ALANINE-DEG3-PWY           | alanine biosynthesis/degradation                                   | Degradation/Utilization/Assimilation | AminoAcid                            |
| ARGININE-SYN4-PWY          | ornithine <i>de novo</i> biosynthesis                              | Biosynthesis                         | AminoAcid                            |
| ARGSPECAT-PWY              | spermine biosynthesis                                              | Biosynthesis                         | AminoAcid                            |
| ASPARAGINE-BIOSYNTHESIS    | asparagine biosynthesis                                            | Biosynthesis                         | AminoAcid                            |
| ASPARAGINE-DEG1-PWY        | asparagine degradation                                             | Degradation/Utilization/Assimilation | AminoAcid                            |
| ASPARTATESYN-PWY           | aspartate biosynthesis                                             | Biosynthesis                         | AminoAcid                            |
| BETA-ALA-DEGRADATION-I-PWY | &beta;-alanine degradation                                         | Degradation/Utilization/Assimilation | AminoAcid                            |
| BSUBPOLYAMSYN-PWY          | spermidine biosynthesis                                            | Biosynthesis                         | AminoAcid                            |
| CYSTEINE-DEG-PWY           | L-cysteine degradation I                                           | Degradation/Utilization/Assimilation | AminoAcid                            |
| GLNSYN-PWY                 | glutamine biosynthesis                                             | Biosynthesis                         | AminoAcid                            |
| GLUDEG-I-PWY               | GABA shunt                                                         | Degradation/Utilization/Assimilation | AminoAcid                            |
| GLUTAMATE-SYN2-PWY         | glutamate biosynthesis/degradation                                 | Biosynthesis                         | AminoAcid                            |
| GLUTAMINDEG-PWY            | glutamine degradation/glutamate biosynthesis                       | Degradation/Utilization/Assimilation | AminoAcid                            |
| GLUTATHIONESYN-PWY         | glutathione biosynthesis                                           | Biosynthesis                         | AminoAcid                            |
| GLYCLEAV-PWY               | glycine cleavage                                                   | Degradation/Utilization/Assimilation | AminoAcid                            |
| GLYSYN-ALA-PWY             | glycine biosynthesis                                               | Biosynthesis                         | AminoAcid                            |
| GLYSYN-PWY                 | glycine/serine biosynthesis                                        | Biosynthesis                         | AminoAcid                            |
| HOMOCYSDEGR-PWY            | cysteine biosynthesis/homocysteine degradation (trans-sulfuration) | Degradation/Utilization/Assimilation | AminoAcid                            |
| HYDROXYPRODEG-PWY          | 4-hydroxyproline degradation                                       | Degradation/Utilization/Assimilation | AminoAcid                            |
| ILEUDEG-PWY                | isoleucine degradation                                             | Degradation/Utilization/Assimilation | AminoAcid                            |
| LEU-DEG2-PWY               | leucine degradation                                                | Degradation/Utilization/Assimilation | AminoAcid                            |
| LYSINE-DEG1-PWY            | lysine degradation I (saccharopine pathway)                        | Degradation/Utilization/Assimilation | AminoAcid                            |
| METHIONINE-DEG1-PWY        | methionine degradation                                             | Degradation/Utilization/Assimilation | AminoAcid                            |
| PHENYLALANINE-DEG1-PWY     | phenylalanine degradation/tyrosine biosynthesis                    | Degradation/Utilization/Assimilation | AminoAcid                            |
| PROSYN-PWY                 | proline biosynthesis                                               | Biosynthesis                         | AminoAcid                            |
| PROUT-PWY                  | proline degradation                                                | Degradation/Utilization/Assimilation | AminoAcid                            |
| PWY-0                      | putrescine degradation III                                         | Degradation/Utilization/Assimilation | AminoAcid                            |
| PWY0-1305                  | glutamate dependent acid resistance                                | Detoxification                       | AminoAcid                            |
| PWY-3661-1                 | glycine betaine degradation                                        | Degradation/Utilization/Assimilation | AminoAcid                            |
| PWY-40                     | putrescine biosynthesis II                                         | Biosynthesis                         | AminoAcid                            |
| PWY-4041                   | &gamma;-glutamyl cycle                                             | Superpathways                        | AminoAcid                            |
| PWY-4061                   | glutathione-mediated detoxification                                | Detoxification                       | AminoAcid                            |

|          |                                                                    |                                                |           |
|----------|--------------------------------------------------------------------|------------------------------------------------|-----------|
| PWY-4081 | glutathione redox reactions I                                      | Biosynthesis                                   | AminoAcid |
| PWY-46   | putrescine biosynthesis I                                          | Biosynthesis                                   | AminoAcid |
| PWY-4921 | protein citrullination                                             | Biosynthesis                                   | AminoAcid |
| PWY-4983 | citrulline-nitric oxide cycle                                      | Degradation/Utilization/Assimilation           | AminoAcid |
| PWY-4984 | urea cycle                                                         | Degradation/Utilization/Assimilation           | AminoAcid |
| PWY-5030 | histidine degradation                                              | Degradation/Utilization/Assimilation           | AminoAcid |
| PWY-5046 | 2-oxoisovalerate decarboxylation to isobutanoyl-CoA                | Generation of Precursor Metabolites and Energy | AminoAcid |
| PWY-5177 | glutaryl-CoA degradation                                           | Degradation/Utilization/Assimilation           | AminoAcid |
| PWY-5326 | sulfite oxidation                                                  | Degradation/Utilization/Assimilation           | AminoAcid |
| PWY-5328 | superpathway of methionine degradation                             | Degradation/Utilization/Assimilation           | AminoAcid |
| PWY-5329 | L-cysteine degradation II                                          | Degradation/Utilization/Assimilation           | AminoAcid |
| PWY-5331 | taurine biosynthesis                                               | Biosynthesis                                   | AminoAcid |
| PWY-5340 | sulfate activation for sulfonation                                 | Degradation/Utilization/Assimilation           | AminoAcid |
| PWY-5350 | thiosulfate disproportionation III (rhodanese)                     | Degradation/Utilization/Assimilation           | AminoAcid |
| PWY-5651 | tryptophan degradation to 2-amino-3-carboxymuconate semialdehyde   | Degradation/Utilization/Assimilation           | AminoAcid |
| PWY-5652 | 2-amino-3-carboxymuconate semialdehyde degradation to glutaryl-CoA | Degradation/Utilization/Assimilation           | AminoAcid |
| PWY-5905 | hypusine biosynthesis                                              | Biosynthesis                                   | AminoAcid |
| PWY-5921 | L-glutamine tRNA biosynthesis                                      | Biosynthesis                                   | AminoAcid |
| PWY-6030 | serotonin and melatonin biosynthesis                               | Biosynthesis                                   | AminoAcid |
| PWY-6100 | L-carnitine biosynthesis                                           | Biosynthesis                                   | AminoAcid |
| PWY-6117 | spermine and spermidine degradation I                              | Degradation/Utilization/Assimilation           | AminoAcid |
| PWY-6133 | (S)-reticuline biosynthesis                                        | Biosynthesis                                   | AminoAcid |
| PWY-6158 | creatine-phosphate biosynthesis                                    | Biosynthesis                                   | AminoAcid |
| PWY-6173 | histamine biosynthesis                                             | Biosynthesis                                   | AminoAcid |
| PWY-6181 | histamine degradation                                              | Degradation/Utilization/Assimilation           | AminoAcid |
| PWY-6241 | thyroid hormone biosynthesis                                       | Biosynthesis                                   | AminoAcid |
| PWY-6260 | thyroid hormone metabolism I (via deiodination)                    | Degradation/Utilization/Assimilation           | AminoAcid |
| PWY-6261 | thyroid hormone metabolism II (via conjugation and/or degradation) | Degradation/Utilization/Assimilation           | AminoAcid |
| PWY-6281 | selenocysteine biosynthesis                                        | Biosynthesis                                   | AminoAcid |
| PWY-6307 | tryptophan degradation X (mammalian, via tryptamine)               | Degradation/Utilization/Assimilation           | AminoAcid |
| PWY-6313 | serotonin degradation                                              | Degradation/Utilization/Assimilation           | AminoAcid |
| PWY-6334 | L-dopa degradation                                                 | Degradation/Utilization/Assimilation           | AminoAcid |
| PWY-6342 | noradrenaline and adrenaline degradation                           | Degradation/Utilization/Assimilation           | AminoAcid |

|                          |                                                                 |                                      |           |
|--------------------------|-----------------------------------------------------------------|--------------------------------------|-----------|
| PWY-6481                 | L-dopachrome biosynthesis                                       | Biosynthesis                         | AminoAcid |
| PWY-6482                 | diphthamide biosynthesis                                        | Biosynthesis                         | AminoAcid |
| PWY-6498                 | eumelanin biosynthesis                                          | Biosynthesis                         | AminoAcid |
| PWY66-301                | catecholamine biosynthesis                                      | Biosynthesis                         | AminoAcid |
| PWY66-425                | lysine degradation II (pipecolate pathway)                      | Degradation/Utilization/Assimilation | AminoAcid |
| PWY66-426                | hydrogen sulfide biosynthesis (trans-sulfuration)               | Metabolic Clusters                   | AminoAcid |
| PWY66-428                | threonine degradation                                           | Degradation/Utilization/Assimilation | AminoAcid |
| PWY6666-2                | dopamine degradation                                            | Degradation/Utilization/Assimilation | AminoAcid |
| PWY-6688                 | thyronamine and iodothyronamine metabolism                      | Degradation/Utilization/Assimilation | AminoAcid |
| PWY-6755                 | <i>S</i>-methyl-5-thio-&alpha;-D-ribose 1-phosphate degradation | Degradation/Utilization/Assimilation | AminoAcid |
| PWY-6756                 | <i>S</i>-methyl-5'-thioadenosine degradation                    | Degradation/Utilization/Assimilation | AminoAcid |
| SAM-PWY                  | S-adenosyl-L-methionine biosynthesis                            | Biosynthesis                         | AminoAcid |
| SERDEG-PWY               | L-serine degradation                                            | Degradation/Utilization/Assimilation | AminoAcid |
| SER-GLYSYN-PWY-1         | serine and glycine biosynthesis                                 | Superpathways                        | AminoAcid |
| SERSYN-PWY               | serine biosynthesis (phosphorylated route)                      | Biosynthesis                         | AminoAcid |
| TRYPTOPHAN-DEGRADATION-1 | tryptophan degradation                                          | Degradation/Utilization/Assimilation | AminoAcid |
| TYRFUMCAT-PWY            | tyrosine degradation                                            | Degradation/Utilization/Assimilation | AminoAcid |
| VALDEG-PWY               | valine degradation                                              | Degradation/Utilization/Assimilation | AminoAcid |
| PWY66-414                | superpathway of choline degradation to L-serine                 | Superpathways                        | AminoAcid |
| PWY-6292                 | cysteine biosynthesis                                           | Superpathways                        | AminoAcid |
| PWY66-401                | superpathway of tryptophan utilization                          | Superpathways                        | AminoAcid |
| COA-PWY-1                | coenzyme A biosynthesis                                         | Biosynthesis                         | Cofactor  |
| GLYCGREAT-PWY            | creatine biosynthesis                                           | Degradation/Utilization/Assimilation | Cofactor  |
| HEME-BIOSYNTHESIS-II     | heme biosynthesis from uroporphyrinogen-III I                   | Biosynthesis                         | Cofactor  |
| NAD-BIOSYNTHESIS-III     | NAD salvage                                                     | Biosynthesis                         | Cofactor  |
| NADPHOS-DEPHOS-PWY-1     | NAD phosphorylation and dephosphorylation                       | Biosynthesis                         | Cofactor  |
| NADSYN-PWY               | NAD <i>de novo</i> biosynthesis                                 | Biosynthesis                         | Cofactor  |
| PLPSAL-PWY               | pyridoxal 5'-phosphate salvage                                  | Biosynthesis                         | Cofactor  |
| PWY0-1264                | biotin-carboxyl carrier protein assembly                        | Biosynthesis                         | Cofactor  |
| PWY0-1275                | lipoate biosynthesis and incorporation                          | Biosynthesis                         | Cofactor  |
| PWY0-522                 | lipoate salvage                                                 | Biosynthesis                         | Cofactor  |
| PWY-2161                 | folate polyglutamylaton                                         | Biosynthesis                         | Cofactor  |
| PWY-2161B                | glutamate removal from folates                                  | Biosynthesis                         | Cofactor  |
| PWY-2201                 | folate transformations                                          | Biosynthesis                         | Cofactor  |
| PWY-5189                 | tetrapyrrole biosynthesis                                       | Biosynthesis                         | Cofactor  |
| PWY-5653                 | NAD biosynthesis from 2-amino-3-carboxymuconate semialdehyde    | Biosynthesis                         | Cofactor  |

|                |                                                             |                                                |                   |
|----------------|-------------------------------------------------------------|------------------------------------------------|-------------------|
| PWY-5663       | tetrahydrobiopterin <i>de novo</i> biosynthesis             | Biosynthesis                                   | Cofactor          |
| PWY-5754       | 4-hydroxybenzoate biosynthesis                              | Biosynthesis                                   | Cofactor          |
| PWY-5872       | ubiquinol-10 biosynthesis                                   | Biosynthesis                                   | Cofactor          |
| PWY-5874       | heme degradation                                            | Degradation/Utilization/Assimilation           | Cofactor          |
| PWY-5963       | thio-molybdenum cofactor biosynthesis                       | Biosynthesis                                   | Cofactor          |
| PWY-6076       | 1,25-dihydroxyvitamin D<sub>3</sub> biosynthesis            | Biosynthesis                                   | Cofactor          |
| PWY-6309       | L-kynurenine degradation                                    | Superpathways                                  | Cofactor          |
| PWY-6430       | thymine degradation                                         | Degradation/Utilization/Assimilation           | Cofactor          |
| PWY-6613       | tetrahydrofolate salvage from 5,10-methenyltetrahydrofolate | Biosynthesis                                   | Cofactor          |
| PWY66-201      | nicotine degradation IV                                     | Degradation/Utilization/Assimilation           | Cofactor          |
| PWY66-221      | nicotine degradation III                                    | Degradation/Utilization/Assimilation           | Cofactor          |
| PWY66-366      | flavin biosynthesis                                         | Biosynthesis                                   | Cofactor          |
| PWY-6823       | molybdenum cofactor biosynthesis                            | Biosynthesis                                   | Cofactor          |
| PWY-6857       | retinol biosynthesis                                        | Biosynthesis                                   | Cofactor          |
| PWY-6872       | retinoate biosynthesis I                                    | Biosynthesis                                   | Cofactor          |
| PWY-6875       | retinoate biosynthesis II                                   | Biosynthesis                                   | Cofactor          |
| PWY-6898       | thiamin salvage III                                         | Biosynthesis                                   | Cofactor          |
| PWY-6938       | NADH repair                                                 | Generation of Precursor Metabolites and Energy | Cofactor          |
| PWY-7250       | iron-sulfur cluster biosynthesis                            | Biosynthesis                                   | Cofactor          |
| PWY-7283       | wybutosine biosynthesis                                     | Superpathways                                  | Cofactor          |
| PWY-7286       | 7-(3-amino-3-carboxypropyl)-wyosine biosynthesis            | Biosynthesis                                   | Cofactor          |
| THIOREDOX-PWY  | thioredoxin pathway                                         | Biosynthesis                                   | Cofactor          |
| PWY-5920       | heme biosynthesis                                           | Superpathways                                  | Cofactor          |
| DETOX1-PWY     | superoxide radicals degradation                             | Detoxification                                 | Detoxification    |
| GLUT-REDOX-PWY | glutathione redox reactions II                              | Biosynthesis                                   | Detoxification    |
| MGLDLCTANA-PWY | methylglyoxal degradation VI                                | Detoxification                                 | Detoxification    |
| PWY-1801       | formaldehyde oxidation                                      | Degradation/Utilization/Assimilation           | Detoxification    |
| PWY-4202       | arsenate detoxification I (glutaredoxin)                    | Detoxification                                 | Detoxification    |
| PWY-5386       | methylglyoxal degradation I                                 | Detoxification                                 | Detoxification    |
| PWY-5453       | methylglyoxal degradation III                               | Detoxification                                 | Detoxification    |
| PWY-6502       | oxidized GTP and dGTP detoxification                        | Metabolic Clusters                             | Detoxification    |
| PWY66-241      | bupropion degradation                                       | Degradation/Utilization/Assimilation           | Detoxification    |
| PWY-7112       | 4-hydroxy-2-nonenal detoxification                          | Detoxification                                 | Detoxification    |
| PWY66-392      | lipoxin biosynthesis                                        | Biosynthesis                                   | FattyAcid/hormone |
| PWY66-393      | aspirin-triggered lipoxin biosynthesis                      | Biosynthesis                                   | FattyAcid/hormone |



|                              |                                                       |                                                |                         |
|------------------------------|-------------------------------------------------------|------------------------------------------------|-------------------------|
| PWY66-394                    | aspirin triggered resolvin E biosynthesis             | Biosynthesis                                   | FattyAcid/hormone       |
| PWY66-395                    | aspirin triggered resolvin D biosynthesis             | Biosynthesis                                   | FattyAcid/hormone       |
| PWY66-397                    | resolvin D biosynthesis                               | Biosynthesis                                   | FattyAcid/hormone       |
| FAO-PWY                      | fatty acid &beta;-oxidation                           | Degradation/Utilization/Assimilation           | FattyAcid/TAG           |
| FASYN-ELONG-PWY              | fatty acid elongation -- saturated                    | Biosynthesis                                   | FattyAcid/TAG           |
| LIPAS-PWY                    | triacylglycerol degradation                           | Degradation/Utilization/Assimilation           | FattyAcid/TAG           |
| LIPASYN-PWY                  | phospholipases                                        | Metabolic Clusters                             | FattyAcid/TAG           |
| PROPIONMET-PWY               | propionyl-CoA degradation                             | Degradation/Utilization/Assimilation           | FattyAcid/TAG           |
| PWY-5130                     | 2-oxobutanoate degradation                            | Superpathways                                  | FattyAcid/TAG           |
| PWY-5137                     | fatty acid &beta;-oxidation (unsaturated, odd number) | Degradation/Utilization/Assimilation           | FattyAcid/TAG           |
| PWY-5143                     | fatty acid activation                                 | Activation/Inactivation/Interconversion        | FattyAcid/TAG           |
| PWY-5148                     | acyl-CoA hydrolysis                                   | Biosynthesis                                   | FattyAcid/TAG           |
| PWY-5451                     | acetone degradation I (to methylglyoxal)              | Degradation/Utilization/Assimilation           | FattyAcid/TAG           |
| PWY-5966-1                   | fatty acid biosynthesis initiation                    | Biosynthesis                                   | FattyAcid/TAG           |
| PWY-5972                     | stearate biosynthesis                                 | Biosynthesis                                   | FattyAcid/TAG           |
| PWY-5994                     | palmitate biosynthesis                                | Biosynthesis                                   | FattyAcid/TAG           |
| PWY-5996                     | oleate biosynthesis                                   | Biosynthesis                                   | FattyAcid/TAG           |
| PWY-6000                     | &gamma;-linolenate biosynthesis                       | Biosynthesis                                   | FattyAcid/TAG           |
| PWY-6012-1                   | acyl carrier protein metabolism                       | Biosynthesis                                   | FattyAcid/TAG           |
| PWY-6111                     | mitochondrial L-carnitine shuttle                     | Degradation/Utilization/Assimilation           | FattyAcid/TAG           |
| PWY-6535                     | 4-aminobutyrate degradation                           | Degradation/Utilization/Assimilation           | FattyAcid/TAG           |
| PWY66-161                    | oxidative ethanol degradation III                     | Degradation/Utilization/Assimilation           | FattyAcid/TAG           |
| PWY66-162                    | ethanol degradation IV                                | Degradation/Utilization/Assimilation           | FattyAcid/TAG           |
| PWY66-21                     | ethanol degradation II                                | Degradation/Utilization/Assimilation           | FattyAcid/TAG           |
| PWY66-374                    | C20 prostanoid biosynthesis                           | Biosynthesis                                   | FattyAcid/TAG           |
| PWY66-375                    | leukotriene biosynthesis                              | Biosynthesis                                   | FattyAcid/TAG           |
| PWY66-387                    | fatty acid &alpha;-oxidation                          | Degradation/Utilization/Assimilation           | FattyAcid/TAG           |
| PWY66-388                    | fatty acid &alpha;-oxidation III                      | Degradation/Utilization/Assimilation           | FattyAcid/TAG           |
| PWY66-389                    | phytol degradation                                    | Degradation/Utilization/Assimilation           | FattyAcid/TAG           |
| PWY66-391                    | fatty acid &beta;-oxidation (peroxisome)              | Degradation/Utilization/Assimilation           | FattyAcid/TAG           |
| PWY6666-1                    | anandamide degradation                                | Degradation/Utilization/Assimilation           | FattyAcid/TAG           |
| PWY-7049                     | eicosapentaenoate biosynthesis                        | Biosynthesis                                   | FattyAcid/TAG           |
| TRIGLSYN-PWY                 | triacylglycerol biosynthesis                          | Biosynthesis                                   | FattyAcid/TAG           |
| MALATE-ASPARTATE-SHUTTLE-PWY | malate-aspartate shuttle                              | Degradation/Utilization/Assimilation           | Glycolysis/TCA/PentoseP |
| NONOXIPENT-PWY               | pentose phosphate pathway (non-oxidative branch)      | Generation of Precursor Metabolites and Energy | Glycolysis/TCA/PentoseP |

|                                      |                                                                                  |                                                |                         |
|--------------------------------------|----------------------------------------------------------------------------------|------------------------------------------------|-------------------------|
| OXIDATIVEPENT-PWY-1                  | pentose phosphate pathway (oxidative branch)                                     | Generation of Precursor Metabolites and Energy | Glycolysis/TCA/PentoseP |
| PWY0-1313                            | acetate conversion to acetyl-CoA                                                 | Degradation/Utilization/Assimilation           | Glycolysis/TCA/PentoseP |
| PWY0-662                             | PRPP biosynthesis                                                                | Biosynthesis                                   | Glycolysis/TCA/PentoseP |
| PWY-4261                             | glycerol degradation                                                             | Degradation/Utilization/Assimilation           | Glycolysis/TCA/PentoseP |
| PWY-5084                             | 2-oxoglutarate decarboxylation to succinyl-CoA                                   | Degradation/Utilization/Assimilation           | Glycolysis/TCA/PentoseP |
| PWY-5172                             | acetyl-CoA biosynthesis from citrate                                             | Generation of Precursor Metabolites and Energy | Glycolysis/TCA/PentoseP |
| PWY-5481                             | lactate fermentation (reoxidation of cytosolic NADH)                             | Generation of Precursor Metabolites and Energy | Glycolysis/TCA/PentoseP |
| PWY-6118                             | glycerol-3-phosphate shuttle                                                     | Generation of Precursor Metabolites and Energy | Glycolysis/TCA/PentoseP |
| PWY-6405                             | Rapoport-Luebering glycolytic shunt                                              | Biosynthesis                                   | Glycolysis/TCA/PentoseP |
| PWY66-367                            | ketogenesis                                                                      | Generation of Precursor Metabolites and Energy | Glycolysis/TCA/PentoseP |
| PWY66-368                            | ketolysis                                                                        | Generation of Precursor Metabolites and Energy | Glycolysis/TCA/PentoseP |
| PWY66-398                            | TCA cycle                                                                        | Generation of Precursor Metabolites and Energy | Glycolysis/TCA/PentoseP |
| PWY66-399                            | gluconeogenesis                                                                  | Biosynthesis                                   | Glycolysis/TCA/PentoseP |
| PWY66-400                            | glycolysis                                                                       | Generation of Precursor Metabolites and Energy | Glycolysis/TCA/PentoseP |
| PWY66-423                            | fructose 2,6-bisphosphate synthesis/dephosphorylation                            | Biosynthesis                                   | Glycolysis/TCA/PentoseP |
| PYRUVDEHYD-PWY                       | pyruvate decarboxylation to acetyl CoA                                           | Generation of Precursor Metabolites and Energy | Glycolysis/TCA/PentoseP |
| PENTOSE-P-PWY                        | pentose phosphate pathway                                                        | Superpathways                                  | Glycolysis/TCA/PentoseP |
| PWY66-407                            | superpathway of conversion of glucose to acetyl CoA and entry into the TCA cycle | Superpathways                                  | Glycolysis/TCA/PentoseP |
| CHOLINE-BETAINE-ANA-PWY              | choline degradation                                                              | Degradation/Utilization/Assimilation           | MembraneLipids          |
| MANNOSYL-CHITO-DOLICHOL-BIOSYNTHESIS | dolichyl-diphosphooligosaccharide biosynthesis                                   | Biosynthesis                                   | MembraneLipids          |
| PWY-2301                             | <i>myo</i> -inositol <i>de novo</i> biosynthesis                                 | Biosynthesis                                   | MembraneLipids          |
| PWY3DJ-11281                         | sphingomyelin metabolism/ceramide salvage                                        | Biosynthesis                                   | MembraneLipids          |
| PWY3DJ-11470                         | sphingosine and sphingosine-1-phosphate metabolism                               | Degradation/Utilization/Assimilation           | MembraneLipids          |
| PWY3DJ-12                            | ceramide <i>de novo</i> biosynthesis                                             | Biosynthesis                                   | MembraneLipids          |
| PWY3O-450                            | phosphatidylcholine biosynthesis                                                 | Biosynthesis                                   | MembraneLipids          |
| PWY4FS-6                             | phosphatidylethanolamine biosynthesis II                                         | Biosynthesis                                   | MembraneLipids          |

|           |                                                                              |                                      |                |
|-----------|------------------------------------------------------------------------------|--------------------------------------|----------------|
| PWY-5269  | cardiolipin biosynthesis                                                     | Biosynthesis                         | MembraneLipids |
| PWY-5667  | CDP-diacylglycerol biosynthesis                                              | Biosynthesis                         | MembraneLipids |
| PWY-6129  | dolichol and dolichyl phosphate biosynthesis                                 | Biosynthesis                         | MembraneLipids |
| PWY-6351  | D- <i>myo</i> -inositol (1,4,5)-trisphosphate biosynthesis                   | Biosynthesis                         | MembraneLipids |
| PWY-6352  | 3-phosphoinositide biosynthesis                                              | Biosynthesis                         | MembraneLipids |
| PWY-6362  | 1D- <i>myo</i> -inositol hexakisphosphate biosynthesis II (mammalian)        | Biosynthesis                         | MembraneLipids |
| PWY-6363  | D- <i>myo</i> -inositol (1,4,5)-trisphosphate degradation                    | Biosynthesis                         | MembraneLipids |
| PWY-6364  | D- <i>myo</i> -inositol (1,3,4)-trisphosphate biosynthesis                   | Biosynthesis                         | MembraneLipids |
| PWY-6365  | D- <i>myo</i> -inositol (3,4,5,6)-tetrakisphosphate biosynthesis             | Biosynthesis                         | MembraneLipids |
| PWY-6366  | D- <i>myo</i> -inositol (1,4,5,6)-tetrakisphosphate biosynthesis             | Biosynthesis                         | MembraneLipids |
| PWY-6367  | D- <i>myo</i> -inositol-5-phosphate metabolism                               | Biosynthesis                         | MembraneLipids |
| PWY-6368  | 3-phosphoinositide degradation                                               | Degradation/Utilization/Assimilation | MembraneLipids |
| PWY-6369  | inositol pyrophosphates biosynthesis                                         | Biosynthesis                         | MembraneLipids |
| PWY-6554  | 1D- <i>myo</i> -inositol hexakisphosphate biosynthesis V (from Ins(1,3,4)P3) | Biosynthesis                         | MembraneLipids |
| PWY-7501  | phosphatidylserine biosynthesis I                                            | Biosynthesis                         | MembraneLipids |
| PWY-6358  | superpathway of D- <i>myo</i> -inositol (1,4,5)-trisphosphate metabolism     | Superpathways                        | MembraneLipids |
| PWY-6371  | superpathway of inositol phosphate compounds                                 | Superpathways                        | MembraneLipids |
| P121-PWY  | adenine and adenosine salvage I                                              | Biosynthesis                         | Nucleotide     |
| PWY0-1295 | pyrimidine ribonucleosides degradation                                       | Degradation/Utilization/Assimilation | Nucleotide     |
| PWY0-1296 | purine ribonucleosides degradation to ribose-1-phosphate                     | Degradation/Utilization/Assimilation | Nucleotide     |
| PWY-3982  | uracil degradation                                                           | Biosynthesis                         | Nucleotide     |
| PWY-5686  | UMP biosynthesis                                                             | Biosynthesis                         | Nucleotide     |
| PWY-5695  | urate biosynthesis/inosine 5'-phosphate degradation                          | Degradation/Utilization/Assimilation | Nucleotide     |
| PWY-6121  | 5-aminoimidazole ribonucleotide biosynthesis                                 | Biosynthesis                         | Nucleotide     |
| PWY-6124  | inosine-5'-phosphate biosynthesis                                            | Biosynthesis                         | Nucleotide     |
| PWY-6608  | guanosine nucleotides degradation                                            | Degradation/Utilization/Assimilation | Nucleotide     |
| PWY-6609  | adenine and adenosine salvage III                                            | Biosynthesis                         | Nucleotide     |
| PWY-6619  | adenine and adenosine salvage II                                             | Biosynthesis                         | Nucleotide     |
| PWY-6620  | guanine and guanosine salvage                                                | Biosynthesis                         | Nucleotide     |

|                  |                                                                                           |                                      |            |
|------------------|-------------------------------------------------------------------------------------------|--------------------------------------|------------|
| PWY66-385        | dTMP <i>&lt;i&gt;de novo&lt;/i&gt;</i> biosynthesis (mitochondrial)                       | Biosynthesis                         | Nucleotide |
| PWY66-420        | carosine biosynthesis                                                                     | Biosynthesis                         | Nucleotide |
| PWY66-421        | homocarnosine biosynthesis                                                                | Biosynthesis                         | Nucleotide |
| PWY-7176         | UTP and CTP <i>&lt;i&gt;de novo&lt;/i&gt;</i> biosynthesis                                | Biosynthesis                         | Nucleotide |
| PWY-7177         | UTP and CTP dephosphorylation II                                                          | Degradation/Utilization/Assimilation | Nucleotide |
| PWY-7179-1       | purine deoxyribonucleosides degradation                                                   | Degradation/Utilization/Assimilation | Nucleotide |
| PWY-7180         | 2'-deoxy- $\alpha$ -D-ribose 1-phosphate degradation                                      | Degradation/Utilization/Assimilation | Nucleotide |
| PWY-7181         | pyrimidine deoxyribonucleosides degradation                                               | Degradation/Utilization/Assimilation | Nucleotide |
| PWY-7184         | pyrimidine deoxyribonucleotides <i>&lt;i&gt;de novo&lt;/i&gt;</i> biosynthesis            | Metabolic Clusters                   | Nucleotide |
| PWY-7185         | UTP and CTP dephosphorylation I                                                           | Degradation/Utilization/Assimilation | Nucleotide |
| PWY-7193         | pyrimidine ribonucleosides salvage I                                                      | Biosynthesis                         | Nucleotide |
| PWY-7197         | pyrimidine deoxyribonucleotide phosphorylation                                            | Metabolic Clusters                   | Nucleotide |
| PWY-7199         | pyrimidine deoxyribonucleosides salvage                                                   | Biosynthesis                         | Nucleotide |
| PWY-7205         | CMP phosphorylation                                                                       | Biosynthesis                         | Nucleotide |
| PWY-7210         | pyrimidine deoxyribonucleotides biosynthesis from CTP                                     | Metabolic Clusters                   | Nucleotide |
| PWY-7219         | adenosine ribonucleotides <i>&lt;i&gt;de novo&lt;/i&gt;</i> biosynthesis                  | Biosynthesis                         | Nucleotide |
| PWY-7221         | guanosine ribonucleotides <i>&lt;i&gt;de novo&lt;/i&gt;</i> biosynthesis                  | Biosynthesis                         | Nucleotide |
| PWY-7224         | purine deoxyribonucleosides salvage                                                       | Metabolic Clusters                   | Nucleotide |
| PWY-7226         | guanosine deoxyribonucleotides <i>&lt;i&gt;de novo&lt;/i&gt;</i> biosynthesis             | Biosynthesis                         | Nucleotide |
| PWY-7227         | adenosine deoxyribonucleotides <i>&lt;i&gt;de novo&lt;/i&gt;</i> biosynthesis             | Biosynthesis                         | Nucleotide |
| SALVADEHYPOX-PWY | adenosine nucleotides degradation                                                         | Degradation/Utilization/Assimilation | Nucleotide |
| PWY0-162         | superpathway of pyrimidine ribonucleotides <i>&lt;i&gt;de novo&lt;/i&gt;</i> biosynthesis | Superpathways                        | Nucleotide |
| PWY-841          | purine nucleotides <i>&lt;i&gt;de novo&lt;/i&gt;</i> biosynthesis                         | Superpathways                        | Nucleotide |
| PWY-6353         | purine nucleotides degradation                                                            | Superpathways                        | Nucleotide |
| PWY-7209         | pyrimidine ribonucleosides degradation                                                    | Superpathways                        | Nucleotide |
| PWY-7200         | superpathway of pyrimidine deoxyribonucleoside salvage                                    | Superpathways                        | Nucleotide |
| PWY-7228         | guanosine nucleotides <i>&lt;i&gt;de novo&lt;/i&gt;</i> biosynthesis                      | Superpathways                        | Nucleotide |

|                      |                                                                                |                                      |                 |
|----------------------|--------------------------------------------------------------------------------|--------------------------------------|-----------------|
| PWY-7211             | superpathway of pyrimidine deoxyribonucleotides<br><i>de novo</i> biosynthesis | Superpathways                        | Nucleotide      |
| PWY66-409            | superpathway of purine nucleotide salvage                                      | Superpathways                        | Nucleotide      |
| BGALACT-PWY          | lactose degradation III                                                        | Degradation/Utilization/Assimilation | Polysaccharides |
| GLUAMCAT-PWY         | <i>N</i>-acetylglucosamine degradation I                                       | Degradation/Utilization/Assimilation | Polysaccharides |
| MANNCAT-PWY          | D-mannose degradation                                                          | Degradation/Utilization/Assimilation | Polysaccharides |
| PWY0-1182            | trehalose degradation                                                          | Degradation/Utilization/Assimilation | Polysaccharides |
| PWY-4101             | sorbitol degradation I                                                         | Degradation/Utilization/Assimilation | Polysaccharides |
| PWY-4821             | UDP-D-xylose and UDP-D-glucuronate biosynthesis                                | Biosynthesis                         | Polysaccharides |
| PWY-5067             | glycogen biosynthesis                                                          | Biosynthesis                         | Polysaccharides |
| PWY-5512             | UDP-<i>N</i>-acetyl-D-galactosamine biosynthesis I                             | Biosynthesis                         | Polysaccharides |
| PWY-5514             | UDP-<i>N</i>-acetyl-D-galactosamine biosynthesis II                            | Biosynthesis                         | Polysaccharides |
| PWY-55y5             | D-glucuronate degradation                                                      | Degradation/Utilization/Assimilation | Polysaccharides |
| PWY-5659             | GDP-mannose biosynthesis                                                       | Biosynthesis                         | Polysaccharides |
| PWY-5661-1           | GDP-glucose biosynthesis II                                                    | Biosynthesis                         | Polysaccharides |
| PWY-5941-1           | glycogenolysis                                                                 | Degradation/Utilization/Assimilation | Polysaccharides |
| PWY-6                | GDP-L-fucose biosynthesis II (from L-fucose)                                   | Biosynthesis                         | Polysaccharides |
| PWY-6138             | CMP-<i>N</i>-acetylneuraminate biosynthesis I (eukaryotes)                     | Biosynthesis                         | Polysaccharides |
| PWY-6517             | <i>N</i>-acetylglucosamine degradation II                                      | Superpathways                        | Polysaccharides |
| PWY-6558             | heparan sulfate biosynthesis (late stages)                                     | Biosynthesis                         | Polysaccharides |
| PWY-6566             | chondroitin and dermatan biosynthesis                                          | Biosynthesis                         | Polysaccharides |
| PWY-6567             | chondroitin sulfate biosynthesis (late stages)                                 | Biosynthesis                         | Polysaccharides |
| PWY-6568             | dermatan sulfate biosynthesis (late stages)                                    | Biosynthesis                         | Polysaccharides |
| PWY-6573             | chondroitin sulfate degradation (metazoa)                                      | Degradation/Utilization/Assimilation | Polysaccharides |
| PWY-6576             | dermatan sulfate degradation (metazoa)                                         | Degradation/Utilization/Assimilation | Polysaccharides |
| PWY-66               | GDP-L-fucose biosynthesis I (from GDP-D-mannose)                               | Biosynthesis                         | Polysaccharides |
| PWY66-373            | sucrose degradation                                                            | Degradation/Utilization/Assimilation | Polysaccharides |
| PWY66-422            | D-galactose degradation V (Leloir pathway)                                     | Degradation/Utilization/Assimilation | Polysaccharides |
| UDPNACETYLGALSYN-PWY | UDP-<i>N</i>-acetyl-D-glucosamine biosynthesis II                              | Biosynthesis                         | Polysaccharides |
| PWY-6569             | chondroitin sulfate biosynthesis                                               | Superpathways                        | Polysaccharides |
| PWY-6571             | dermatan sulfate biosynthesis                                                  | Superpathways                        | Polysaccharides |
| PWY-5525             | D-Glucuronate-Degradation                                                      | Degradation/Utilization/Assimilation | Polysaccharides |

|           |                                                                           |                                      |                     |
|-----------|---------------------------------------------------------------------------|--------------------------------------|---------------------|
| PWY-6398  | melatonin degradation I                                                   | Degradation/Utilization/Assimilation | SecondaryMetabolism |
| PWY-6399  | melatonin degradation II                                                  | Degradation/Utilization/Assimilation | SecondaryMetabolism |
|           | superpathway of geranylgeranyldiphosphate biosynthesis I (via mevalonate) | Superpathways                        | SecondaryMetabolism |
| PWY-6402  | superpathway of melatonin degradation                                     | Superpathways                        | SecondaryMetabolism |
| PWY-5120  | geranylgeranyldiphosphate biosynthesis                                    | Biosynthesis                         | Steroid             |
| PWY-5123  | <i>trans, trans</i>-farnesyl diphosphate biosynthesis                     | Biosynthesis                         | Steroid             |
| PWY-5670  | epoxysqualene biosynthesis                                                | Biosynthesis                         | Steroid             |
| PWY-6061  | bile acid biosynthesis, neutral pathway                                   | Biosynthesis                         | Steroid             |
| PWY-6074  | zymosterol biosynthesis                                                   | Biosynthesis                         | Steroid             |
| PWY-6132  | lanosterol biosynthesis                                                   | Biosynthesis                         | Steroid             |
| PWY-6377  | &alpha;-tocopherol degradation                                            | Degradation/Utilization/Assimilation | Steroid             |
| PWY66-3   | cholesterol biosynthesis II (via 24,25-dihydrolanosterol)                 | Superpathways                        | Steroid             |
| PWY66-341 | cholesterol biosynthesis I                                                | Superpathways                        | Steroid             |
| PWY66-377 | pregnenolone biosynthesis                                                 | Biosynthesis                         | Steroid             |
| PWY66-378 | androgen biosynthesis                                                     | Biosynthesis                         | Steroid             |
| PWY66-380 | estradiol biosynthesis I                                                  | Biosynthesis                         | Steroid             |
| PWY66-381 | glucocorticoid biosynthesis                                               | Biosynthesis                         | Steroid             |
| PWY66-382 | mineralocorticoid biosynthesis                                            | Biosynthesis                         | Steroid             |
| PWY66-4   | cholesterol biosynthesis III (via desmosterol)                            | Superpathways                        | Steroid             |
| PWY-7299  | progesterone biosynthesis                                                 | Biosynthesis                         | Steroid             |
| PWY-7306  | estradiol biosynthesis II                                                 | Biosynthesis                         | Steroid             |
| PWY-7455  | allopregnanolone biosynthesis                                             | Biosynthesis                         | Steroid             |
| PWY-922   | mevalonate pathway                                                        | Biosynthesis                         | Steroid             |
| PWY-7305  | superpathway of steroid hormone biosynthesis                              | Superpathways                        | Steroid             |
| PWY66-5   | superpathway of cholesterol biosynthesis                                  | Superpathways                        | Steroid             |
